# Supplementary material for: Selection of candidate genes affecting meat quality and preliminary exploration of related molecular mechanisms in the Mashen pig
Source: PubMed Central journal article supplement (PMC6599955; doi:10.5713/ajas.18.0718), 2019-02-14
Supplement: ajas-18-0718-suppl.pdf [file ajas-18-0718-suppl.pdf]

**Table S1 The information of known DEGs**

| id                 | D6_fpkm  | M6_fpkm  | log2(FC) | Symbol            | Description                                                                                                         |
|--------------------|----------|----------|----------|-------------------|---------------------------------------------------------------------------------------------------------------------|
| ENSSSCT00000000144 | 5.41     | 0.113333 | -5.57698 | PVALB             | parvalbumin [Source:HGNC Symbol;Acc:HGNC:9704]                                                                      |
| ENSSSCT00000000392 | 0.001    | 1.236667 | 10.27224 | PYM1              | PYM homolog 1, exon junction complex associated factor [Source:HGNC Symbol;Acc:HGNC:30258]                          |
| ENSSSCT00000000934 | 0.016667 | 1.836667 | 6.78398  | PAH               | phenylalanine hydroxylase [Source:HGNC Symbol;Acc:HGNC:8582]                                                        |
| ENSSSCT00000001193 | 0.001    | 0.253333 | 7.984893 | FAM65B            | family with sequence similarity 65, member B [Source:HGNC Symbol;Acc:HGNC:13872]                                    |
| ENSSSCT00000001329 | 56.90333 | 125.35   | 1.139377 | TMP-CH242-74M17.2 | -                                                                                                                   |
| ENSSSCT00000001927 | 7.633333 | 20.51333 | 1.426177 | PLA2G7            | phospholipase A2, group VII (platelet-activating factor acetylhydrolase, plasma) [Source:HGNC Symbol;Acc:HGNC:9040] |
| ENSSSCT00000002252 | 15.03    | 44.52667 | 1.566825 | DHRS4             | Dehydrogenase/reductase SDR family member 4 [Source:UniProtKB/Swiss-Prot;Acc:Q8WNV7]                                |
| ENSSSCT00000002510 | 0.83     | 0.003333 | -7.96    | NR2F2             | nuclear receptor subfamily 2, group F, member 2 [Source:HGNC Symbol;Acc:HGNC:7976]                                  |
| ENSSSCT00000002650 | 97.94    | 2.403333 | -5.34879 | FOS               | -                                                                                                                   |
| ENSSSCT00000002713 | 0.243333 | 0.001    | -7.92679 | TC2N              | tandem C2 domains, nuclear [Source:HGNC Symbol;Acc:HGNC:19859]                                                      |
| ENSSSCT00000002808 | 0.001    | 664.8433 | 19.34265 | -                 | 40S ribosomal protein S21 [Source:UniProtKB/Swiss-Prot;Acc:P63221]                                                  |
| ENSSSCT00000002812 | 0.03     | 2.223333 | 6.211618 | ZNF839            | zinc finger protein 839 [Source:HGNC Symbol;Acc:HGNC:20345]                                                         |
| ENSSSCT00000003504 | 21.79    | 5.06     | -2.10646 | PPP1R15A          | protein phosphatase 1, regulatory subunit 15A                                                                       |

|                    |          |          |          |            |   |                                                                                                                                  |
|--------------------|----------|----------|----------|------------|---|----------------------------------------------------------------------------------------------------------------------------------|
| ENSSSCT00000003939 | 83.85667 | 367.88   | 2.133238 | -          | - | [Source:HGNC<br>Symbol;Acc:HGNC:14375]                                                                                           |
| ENSSSCT00000004174 | 0.001    | 1.026667 | 10.00375 | ZZZ3       | - | zinc finger, ZZ-type<br>containing 3 [Source:HGNC<br>Symbol;Acc:HGNC:24523]                                                      |
| ENSSSCT00000004436 | 5.663333 | 1.893333 | -1.58072 | THBS2      | - | thrombospondin 2<br>[Source:HGNC<br>Symbol;Acc:HGNC:11786]                                                                       |
| ENSSSCT00000005271 | 0.77     | 0.001    | -9.58871 | BAHD1      | - | bromo adjacent homology<br>domain containing 1<br>[Source:HGNC<br>Symbol;Acc:HGNC:29153]                                         |
| ENSSSCT00000005288 | 15.11333 | 4.053333 | -1.89864 | THBS1      | - | -                                                                                                                                |
| ENSSSCT00000005633 | 0.13     | 0.001    | -7.02237 | SYNE2      | - | spectrin repeat containing,<br>nuclear envelope 2<br>[Source:HGNC<br>Symbol;Acc:HGNC:17084]                                      |
| ENSSSCT00000005967 | 16.36333 | 55.52667 | 1.762714 | NIPSNAP3B  | - | nipsnap homolog 3B (C.<br>elegans) [Source:HGNC<br>Symbol;Acc:HGNC:23641]                                                        |
| ENSSSCT00000006226 | 3.243333 | 10.48    | 1.69209  | CCBL1      | - | cysteine conjugate-beta lyase,<br>cytoplasmic [Source:HGNC<br>Symbol;Acc:HGNC:1564]                                              |
| ENSSSCT00000006644 | 27.02333 | 9.63     | -1.4886  | KLF10      | - | -                                                                                                                                |
| ENSSSCT00000006699 | 16.11667 | 36.75    | 1.189191 | PDP1       | - | pyruvate dehydrogenase<br>phosphatase catalytic subunit<br>1 [Source:HGNC<br>Symbol;Acc:HGNC:9279]                               |
| ENSSSCT00000006706 | 0.001    | 1.856667 | 10.8585  | CU207250.1 | - | -                                                                                                                                |
| ENSSSCT00000006733 | 7.126667 | 2.496667 | -1.51322 | CA2        | - | carbonic anhydrase II<br>[Source:HGNC<br>Symbol;Acc:HGNC:1373]                                                                   |
| ENSSSCT00000006967 | 0.001    | 0.556667 | 9.12067  | NDUFS2     | - | NADH dehydrogenase<br>(ubiquinone) Fe-S protein 2,<br>49kDa (NADH-coenzyme Q<br>reductase) [Source:HGNC<br>Symbol;Acc:HGNC:7708] |
| ENSSSCT00000007206 | 0.403333 | 5.16     | 3.677327 | S100A4     | - | S100 calcium binding protein<br>A4 [Source:HGNC<br>Symbol;Acc:HGNC:10494]                                                        |
| ENSSSCT00000007534 | 0.001    | 1.286667 | 10.32942 | -          | - | -                                                                                                                                |
| ENSSSCT00000007573 | 0.001    | 0.353333 | 8.464886 | -          | - | -                                                                                                                                |

|                    |          |          |          |        |                                                                                                      |
|--------------------|----------|----------|----------|--------|------------------------------------------------------------------------------------------------------|
| ENSSSCT00000007604 | 7.406667 | 0.753333 | -3.29746 | CYR61  | cysteine-rich, angiogenic inducer, 61 [Source:HGNC Symbol;Acc:HGNC:2654]                             |
| ENSSSCT00000007834 | 0.936667 | 0.001    | -9.87139 | -      | -                                                                                                    |
| ENSSSCT00000008247 | 0.756667 | 0.001    | -9.56351 | GNAS   | Sus scrofa GNAS complex locus (GNAS), transcript variant 1, mRNA. [Source:RefSeq mRNA;Acc:NM_214312] |
| ENSSSCT00000008741 | 49.60667 | 227.2367 | 2.19559  | HBQ1   | hemoglobin, theta 1 [Source:HGNC Symbol;Acc:HGNC:4833]                                               |
| ENSSSCT00000008947 | 9.223333 | 1.52     | -2.60122 | -      | 60S ribosomal protein L31 [Source:UniProtKB/Swiss-Prot;Acc:P62901]                                   |
| ENSSSCT00000009163 | 101.1733 | 243.73   | 1.268455 | -      | -                                                                                                    |
| ENSSSCT00000009164 | 68.20333 | 174.8767 | 1.358424 | -      | -                                                                                                    |
| ENSSSCT00000009339 | 0.466667 | 5.57     | 3.577213 | CLIP4  | CAP-GLY domain containing linker protein family, member 4 [Source:HGNC Symbol;Acc:HGNC:26108]        |
| ENSSSCT00000009375 | 50.39    | 124.28   | 1.302385 | HADHB  | long-chain 3-ketoacyl-CoA thiolase [Source:RefSeq peptide;Acc:NP_999131]                             |
| ENSSSCT00000009461 | 1.64     | 7.583333 | 2.209136 | RSAD2  | -                                                                                                    |
| ENSSSCT00000009813 | 4.433333 | 0.153333 | -4.85365 | CXCL2  | C-X-C motif chemokine 2 precursor [Source:RefSeq peptide;Acc:NP_001001861]                           |
| ENSSSCT00000009859 | 0.001    | 1.023333 | 9.99906  | TLR2   | toll-like receptor 2 [Source:HGNC Symbol;Acc:HGNC:11848]                                             |
| ENSSSCT00000009885 | 0.001    | 1.533333 | 10.58246 | -      | -                                                                                                    |
| ENSSSCT00000010013 | 0.003333 | 0.92     | 8.108524 | ETNPPL | ethanolamine-phosphate phospho-lyase [Source:HGNC Symbol;Acc:HGNC:14404]                             |
| ENSSSCT00000010151 | 1.303333 | 0.001    | -10.348  | -      | -                                                                                                    |
| ENSSSCT00000010229 | 19.25667 | 8.03     | -1.26189 | HSPH1  | heat shock protein 105 kDa [Source:RefSeq peptide;Acc:NP_001090973]                                  |
| ENSSSCT00000010558 | 0.001    | 6.673333 | 12.70419 | PEBP4  | Sus scrofa phosphatidylethanolamine-binding protein 4 (PEBP4),                                       |

|                    |          |          |          |         |                                                                                                                                           |
|--------------------|----------|----------|----------|---------|-------------------------------------------------------------------------------------------------------------------------------------------|
| ENSSSCT00000010832 | 3.103333 | 9.783333 | 1.656507 | OAS1    | mRNA. [Source:RefSeq<br>mRNA;Acc:NM_001162888]<br>2'-5'-oligoadenylate<br>synthetase 1, 40/46kDa<br>[Source:HGNC<br>Symbol;Acc:HGNC:8086] |
| ENSSSCT00000011053 | 0.25     | 0.001    | -7.96578 | PI4KA   | kinase, catalytic, alpha<br>[Source:HGNC<br>Symbol;Acc:HGNC:8983]                                                                         |
| ENSSSCT00000011308 | 5.313333 | 16.15333 | 1.604143 | -       | -                                                                                                                                         |
| ENSSSCT00000011527 | 63.87333 | 173.52   | 1.441816 | GOT1    | Aspartate aminotransferase,<br>cytoplasmic<br>[Source:UniProtKB/Swiss-<br>Prot;Acc:P00503]                                                |
| ENSSSCT00000011662 | 0.84     | 0.013333 | -5.97728 | HSPA12A | heat shock 70kDa protein<br>12A [Source:HGNC<br>Symbol;Acc:HGNC:19022]                                                                    |
| ENSSSCT00000011679 | 4.763333 | 0.886667 | -2.42551 | NANOS1  | nanos homolog 1<br>(Drosophila) [Source:HGNC<br>Symbol;Acc:HGNC:23044]                                                                    |
| ENSSSCT00000012400 | 378.2933 | 994.8167 | 1.394925 | MYL3    | -                                                                                                                                         |
| ENSSSCT00000012465 | 0.001    | 0.646667 | 9.336878 | -       | -                                                                                                                                         |
| ENSSSCT00000013322 | 19.83    | 0.001    | -14.2754 | -       | -                                                                                                                                         |
| ENSSSCT00000013323 | 5.7      | 0.086667 | -6.03934 | -       | -                                                                                                                                         |
| ENSSSCT00000013502 | 0.52     | 3.57     | 2.779341 | ALAS2   | 5'-aminolevulinate synthase 2<br>[Source:HGNC<br>Symbol;Acc:HGNC:397]                                                                     |
| ENSSSCT00000013571 | 1.623333 | 12.83    | 2.98249  | PHKA1   | phosphorylase kinase, alpha 1<br>(muscle) [Source:HGNC<br>Symbol;Acc:HGNC:8925]                                                           |
| ENSSSCT00000014241 | 4.983333 | 14.59333 | 1.550126 | ESRRA   | estrogen-related receptor<br>alpha [Source:HGNC<br>Symbol;Acc:HGNC:3471]                                                                  |
| ENSSSCT00000014538 | 0.001    | 2.046667 | 10.99906 | HIPK3   | homeodomain interacting<br>protein kinase 3<br>[Source:HGNC<br>Symbol;Acc:HGNC:4915]                                                      |
| ENSSSCT00000014800 | 0.001    | 1.086667 | 10.08569 | -       | -                                                                                                                                         |
| ENSSSCT00000015061 | 94.59333 | 17.26    | -2.45431 | -       | -                                                                                                                                         |
| ENSSSCT00000015384 | 0.23     | 7.33     | 4.994107 | ANKDD1B | ankyrin repeat and death<br>domain containing 1B<br>[Source:HGNC<br>Symbol;Acc:HGNC:32525]                                                |

|                    |          |          |          |          |                                                                                                                |
|--------------------|----------|----------|----------|----------|----------------------------------------------------------------------------------------------------------------|
| ENSSSCT00000015432 | 355.4867 | 841.37   | 1.242945 | CKMT2    | -                                                                                                              |
| ENSSSCT00000015449 | 11.43667 | 29.9     | 1.386479 | -        | Cytochrome c oxidase subunit 7C, mitochondrial [Source:UniProtKB/Swiss-Prot;Acc:Q1W0Y2]                        |
| ENSSSCT00000015576 | 53.64667 | 19.52333 | -1.45829 | SLC12A2  | solute carrier family 12 (sodium/potassium/chloride transporter), member 2 [Source:HGNC Symbol;Acc:HGNC:10911] |
| ENSSSCT00000015660 | 7.37     | 0.846667 | -3.1218  | EGR1     | early growth response 1 [Source:HGNC Symbol;Acc:HGNC:3238]                                                     |
| ENSSSCT00000015663 | 1.56     | 0.01     | -7.2854  | EGR1     | early growth response 1 [Source:HGNC Symbol;Acc:HGNC:3238]                                                     |
| ENSSSCT00000015929 | 0.001    | 1.066667 | 10.05889 | -        | -                                                                                                              |
| ENSSSCT00000016196 | 1.433333 | 0.001    | -10.4852 | -        | -                                                                                                              |
| ENSSSCT00000016469 | 80.38    | 3.313333 | -4.60048 | RPS25    | ribosomal protein S25 [Source:HGNC Symbol;Acc:HGNC:10413]                                                      |
| ENSSSCT00000016707 | 421.04   | 7.9      | -5.73596 | PDK4     | -                                                                                                              |
| ENSSSCT00000016780 | 15.67333 | 37.79667 | 1.269947 | CD36     | -                                                                                                              |
| ENSSSCT00000016961 | 13.36333 | 44.67333 | 1.741134 | IVNS1ABP | influenza virus NS1A binding protein [Source:HGNC Symbol;Acc:HGNC:16951]                                       |
| ENSSSCT00000017016 | 0.786667 | 0.001    | -9.61961 | CD34     | CD34 molecule [Source:HGNC Symbol;Acc:HGNC:1662]                                                               |
| ENSSSCT00000017270 | 1.006667 | 0.001    | -9.97537 | SAP130   | Sin3A-associated protein, 130kDa [Source:HGNC Symbol;Acc:HGNC:29813]                                           |
| ENSSSCT00000017282 | 2.286667 | 0.086667 | -4.72163 | NR4A2    | nuclear receptor subfamily 4, group A, member 2 [Source:HGNC Symbol;Acc:HGNC:7981]                             |
| ENSSSCT00000017392 | 66.26667 | 167.0867 | 1.334241 | ATP5G3   | -                                                                                                              |
| ENSSSCT00000017523 | 33.59    | 10.87    | -1.62768 | -        | -                                                                                                              |
| ENSSSCT00000018009 | 43.86    | 147.4    | 1.748759 | AKR1B1   | -                                                                                                              |
| ENSSSCT00000018236 | 9        | 2.916667 | -1.6256  | AEBP1    | AE binding protein 1 [Source:HGNC Symbol;Acc:HGNC:303]                                                         |

|                    |          |          |          |        |                                                                                                                                       |
|--------------------|----------|----------|----------|--------|---------------------------------------------------------------------------------------------------------------------------------------|
| ENSSSCT00000018381 | 56.09667 | 129.4033 | 1.205888 | NNT    | nicotinamide nucleotide<br>transhydrogenase<br>[Source:HGNC<br>Symbol;Acc:HGNC:7863]                                                  |
| ENSSSCT00000018501 | 130.4567 | 25.56667 | -2.35123 | DUSP1  | -<br>ribosomal protein L38<br>[Source:HGNC<br>Symbol;Acc:HGNC:10349]                                                                  |
| ENSSSCT00000018768 | 38.74    | 0.001    | -15.2415 | RPL38  | -                                                                                                                                     |
| ENSSSCT00000019062 | 69.26    | 22.72    | -1.60806 | -      | -<br>ATP synthase, H+<br>transporting, mitochondrial<br>Fo complex, subunit C1<br>(subunit 9) [Source:HGNC<br>Symbol;Acc:HGNC:841]    |
| ENSSSCT00000019098 | 219.1333 | 526.94   | 1.26583  | ATP5G1 | -                                                                                                                                     |
| ENSSSCT00000019601 | 6.24     | 1.123333 | -2.47376 | -      | -<br>NADH dehydrogenase<br>subunit 4L (mitochondrion)<br>[Source:RefSeq<br>peptide;Acc:NP_008642]                                     |
| ENSSSCT00000019681 | 360.45   | 987.2767 | 1.453655 | ND4L   | NADH-ubiquinone<br>oxidoreductase chain 6<br>[Source:UniProtKB/Swiss-<br>Prot;Acc:O79882]                                             |
| ENSSSCT00000019687 | 448.2767 | 1029.107 | 1.198931 | ND6    | -                                                                                                                                     |
| ENSSSCT00000022502 | 0.001    | 0.46     | 8.84549  | -      | -<br>NADH dehydrogenase<br>(ubiquinone) Fe-S protein 7,<br>20kDa (NADH-coenzyme Q<br>reductase) [Source:HGNC<br>Symbol;Acc:HGNC:7714] |
| ENSSSCT00000023318 | 33.22    | 108.5567 | 1.708324 | NDUFS7 | -                                                                                                                                     |
| ENSSSCT00000023380 | 20.19333 | 46.93    | 1.216631 | -      | -                                                                                                                                     |
| ENSSSCT00000023398 | 8.566667 | 0.08     | -6.74259 | -      | -                                                                                                                                     |
| ENSSSCT00000023699 | 0.001    | 2.043333 | 10.99671 | ACO1   | aconitase 1, soluble<br>[Source:HGNC<br>Symbol;Acc:HGNC:117]                                                                          |
| ENSSSCT00000024200 | 1.493333 | 11.39333 | 2.931582 | -      | -                                                                                                                                     |
| ENSSSCT00000024553 | 8.316667 | 0.001    | -13.0218 | -      | -                                                                                                                                     |
| ENSSSCT00000024741 | 0.536667 | 0.001    | -9.06788 | PPIL4  | peptidylprolyl isomerase<br>(cyclophilin)-like 4<br>[Source:HGNC<br>Symbol;Acc:HGNC:15702]                                            |
| ENSSSCT00000024980 | 30.77333 | 0.01     | -11.5875 | -      | -                                                                                                                                     |
| ENSSSCT00000025191 | 0.001    | 3.6      | 11.81378 | MICU2  | mitochondrial calcium uptake<br>2 [Source:HGNC<br>Symbol;Acc:HGNC:31830]                                                              |

|                    |          |          |          |          |                                                                                                             |
|--------------------|----------|----------|----------|----------|-------------------------------------------------------------------------------------------------------------|
| ENSSSCT00000025648 | 0.493333 | 0.001    | -8.94642 | ARAP1    | ArfGAP with RhoGAP domain, ankyrin repeat and PH domain 1 [Source:HGNC Symbol;Acc:HGNC:16925]               |
| ENSSSCT00000026377 | 6.593333 | 1.346667 | -2.29162 | RASGEF1B | ras-GEF domain-containing family member 1B [Source:RefSeq peptide;Acc:NP_001182296]                         |
| ENSSSCT00000026451 | 14.86333 | 55.65667 | 1.904797 | PPP1R3B  | protein phosphatase 1, regulatory subunit 3B [Source:HGNC Symbol;Acc:HGNC:14942]                            |
| ENSSSCT00000026880 | 0.001    | 26.21    | 14.67783 | -        | -                                                                                                           |
| ENSSSCT00000027232 | 188.0133 | 830.4833 | 2.143116 | -        | -                                                                                                           |
| ENSSSCT00000027235 | 0.74     | 0.001    | -9.53138 | RFFL     | ring finger and FYVE-like domain containing E3 ubiquitin protein ligase [Source:HGNC Symbol;Acc:HGNC:24821] |
| ENSSSCT00000027298 | 12.68    | 4.206667 | -1.59181 | -        | -                                                                                                           |
| ENSSSCT00000027462 | 0.383333 | 0.006667 | -5.84549 | WDR19    | WD repeat domain 19 [Source:HGNC Symbol;Acc:HGNC:18340]                                                     |
| ENSSSCT00000027771 | 121.9833 | 308.7767 | 1.33988  | PDHA1    | pyruvate dehydrogenase (lipoamide) alpha 1 [Source:HGNC Symbol;Acc:HGNC:8806]                               |
| ENSSSCT00000027869 | 6.656667 | 1.436667 | -2.21207 | -        | -                                                                                                           |
| ENSSSCT00000028216 | 224.77   | 64.15667 | -1.80878 | -        | -                                                                                                           |
| ENSSSCT00000028237 | 45.18333 | 110.9167 | 1.295614 | -        | -                                                                                                           |
| ENSSSCT00000028542 | 6.95     | 1.233333 | -2.49445 | -        | -                                                                                                           |
| ENSSSCT00000028661 | 102.8833 | 17.34667 | -2.56828 | BTG2     | -                                                                                                           |
| ENSSSCT00000028884 | 0.193333 | 0.001    | -7.59495 | DDX3Y    | DEAD (Asp-Glu-Ala-Asp) box helicase 3, Y-linked [Source:HGNC Symbol;Acc:HGNC:2699]                          |
| ENSSSCT00000028975 | 110.8933 | 20.70667 | -2.42101 | SHISA2   | shisa family member 2 [Source:HGNC Symbol;Acc:HGNC:20366]                                                   |
| ENSSSCT00000029040 | 10.93667 | 0.001    | -13.4169 | -        | -                                                                                                           |
| ENSSSCT00000029270 | 4.463333 | 12       | 1.426841 | IFI44L   | interferon-induced protein 44-like [Source:HGNC Symbol;Acc:HGNC:17817]                                      |

|                    |          |          |          |          |                                                                                                                  |
|--------------------|----------|----------|----------|----------|------------------------------------------------------------------------------------------------------------------|
| ENSSSCT00000029625 | 0.001    | 3.1      | 11.59805 | USP9Y    | ubiquitin specific peptidase 9,<br>Y-linked [Source:HGNC<br>Symbol;Acc:HGNC:12633]                               |
| ENSSSCT00000029905 | 0.001    | 1.39     | 10.44087 | FKBP9    | FK506 binding protein 9, 63<br>kDa [Source:HGNC<br>Symbol;Acc:HGNC:3725]                                         |
| ENSSSCT00000030563 | 0.056667 | 3.093333 | 5.770518 | -        | -                                                                                                                |
| ENSSSCT00000030802 | 0.743333 | 0.001    | -9.53787 | -        | -                                                                                                                |
| ENSSSCT00000030852 | 2.4      | 0.001    | -11.2288 | -        | -                                                                                                                |
| ENSSSCT00000030903 | 5.53     | 17.15333 | 1.633138 | -        | -                                                                                                                |
| ENSSSCT00000030906 | 0.12     | 0.001    | -6.90689 | KIAA2026 | KIAA2026 [Source:HGNC<br>Symbol;Acc:HGNC:23378]                                                                  |
| ENSSSCT00000031037 | 0.001    | 0.41     | 8.67948  | ETV6     | ets variant 6 [Source:HGNC<br>Symbol;Acc:HGNC:3495]                                                              |
| ENSSSCT00000031092 | 0.001    | 0.92     | 9.84549  | -        | -                                                                                                                |
| ENSSSCT00000031122 | 0.001    | 0.96     | 9.906891 | P4HA2    | prolyl 4-hydroxylase, alpha<br>polypeptide II<br>[Source:HGNC<br>Symbol;Acc:HGNC:8547]                           |
| ENSSSCT00000031202 | 6.266667 | 0.001    | -12.6135 | -        | -                                                                                                                |
| ENSSSCT00000031428 | 1.976667 | 6.473333 | 1.711439 | SLC16A3  | solute carrier family 16<br>(monocarboxylate<br>transporter), member 3<br>[Source:HGNC<br>Symbol;Acc:HGNC:10924] |
| ENSSSCT00000031509 | 3.393333 | 1.16     | -1.54858 | -        | -                                                                                                                |
| ENSSSCT00000031950 | 5.616667 | 0.38     | -3.88564 | ADAMTS1  | -                                                                                                                |
| ENSSSCT00000031972 | 2.696667 | 33.12667 | 3.618744 | DEFB1    | -                                                                                                                |
| ENSSSCT00000032277 | 0.246667 | 0.001    | -7.94642 | UBR1     | ubiquitin protein ligase E3<br>component n-recognin 1<br>[Source:HGNC<br>Symbol;Acc:HGNC:16808]                  |
| ENSSSCT00000032593 | 11.29667 | 69.40333 | 2.619108 | CD36     | -                                                                                                                |
| ENSSSCT00000032649 | 2.423333 | 0.443333 | -2.45053 | KLF4     | Kruppel-like factor 4 (gut)<br>[Source:HGNC<br>Symbol;Acc:HGNC:6348]                                             |
| ENSSSCT00000032662 | 0.001    | 3.06     | 11.57932 | LIFR     | leukemia inhibitory factor<br>receptor alpha<br>[Source:HGNC<br>Symbol;Acc:HGNC:6597]                            |
| ENSSSCT00000033729 | 0.816667 | 0.001    | -9.6736  | TLR2     | toll-like receptor 2<br>[Source:HGNC<br>Symbol;Acc:HGNC:11848]                                                   |



|                    |          |          |          |                    |                                                                                                   |
|--------------------|----------|----------|----------|--------------------|---------------------------------------------------------------------------------------------------|
| ENSSSCT00000033745 | 0.433333 | 3.166667 | 2.869416 | MAOB               | monoamine oxidase B<br>[Source:HGNC<br>Symbol;Acc:HGNC:6834]                                      |
| ENSSSCT00000034484 | 0.826667 | 0.001    | -9.69116 | ACVR2B             | activin A receptor, type IIB<br>[Source:HGNC<br>Symbol;Acc:HGNC:174]                              |
| ENSSSCT00000034640 | 9.07     | 1.403333 | -2.69224 | CXCL2              | C-X-C motif chemokine 2<br>precursor [Source:RefSeq<br>peptide;Acc:NP_001001861]                  |
| ENSSSCT00000034919 | 0.001    | 0.32     | 8.321928 | KDM6A              | lysine (K)-specific<br>demethylase 6A<br>[Source:HGNC<br>Symbol;Acc:HGNC:12637]                   |
| ENSSSCT00000035032 | 1.276667 | 0.001    | -10.3182 | SMS                | spermine synthase<br>[Source:HGNC<br>Symbol;Acc:HGNC:11123]                                       |
| ENSSSCT00000035069 | 0.536667 | 37.23333 | 6.116425 | MYH6               | -                                                                                                 |
| ENSSSCT00000035292 | 1.81     | 0.001    | -10.8218 | SCD                | -                                                                                                 |
| ENSSSCT00000035485 | 20.63333 | 0.683333 | -4.91624 | ATF3               | activating transcription factor<br>3 [Source:HGNC<br>Symbol;Acc:HGNC:785]                         |
| ENSSSCT00000035749 | 2.06     | 0.001    | -11.0084 | FADD               | protein FADD<br>[Source:RefSeq<br>peptide;Acc:NP_001026967]                                       |
| ENSSSCT00000035876 | 123.0433 | 9.196667 | -3.74191 | PVALB              | parvalbumin [Source:HGNC<br>Symbol;Acc:HGNC:9704]                                                 |
| ENSSSCT00000035973 | 1.206667 | 0.001    | -10.2368 | BAG6               | BCL2-associated athanogene<br>6 [Source:HGNC<br>Symbol;Acc:HGNC:13919]                            |
| ENSSSCT00000035982 | 2.516667 | 0.1      | -4.65344 | CH242-<br>138G12.1 | -                                                                                                 |
| ENSSSCT00000036290 | 73.12    | 23.34667 | -1.64705 | JUN                | -                                                                                                 |
| ENSSSCT00000036352 | 0.843333 | 37.77333 | 5.485121 | MYH6               | -                                                                                                 |
| ENSSSCT00000036373 | 4.123333 | 0.06     | -6.1027  | TSPAN6             | tetraspanin-6<br>[Source:RefSeq<br>peptide;Acc:NP_001230990]                                      |
| ENSSSCT00000036434 | 25.99333 | 58.51    | 1.170542 | PDHA1              | pyruvate dehydrogenase<br>(lipoamide) alpha 1<br>[Source:HGNC<br>Symbol;Acc:HGNC:8806]            |
| ENSSSCT00000036440 | 0.001    | 1.2      | 10.22882 | ABCB7              | ATP-binding cassette, sub-<br>family B (MDR/TAP),<br>member 7 [Source:HGNC<br>Symbol;Acc:HGNC:48] |

ENSSSCT00000036536 121.4167 455.2533 1.906703 HBB -

---

**Table S2 The corresponding gene list of GO analysis**

| Ontology                | Class                   | number<br>_of_D6-<br>vs-<br>M6_up | number<br>_of_D6<br>-vs-<br>M6_down | genes_of_D6-vs-M6_up | genes_of_D6-vs-M6_down   |
|-------------------------|-------------------------|-----------------------------------|-------------------------------------|----------------------|--------------------------|
| Biological<br>Processes | metabolic<br>process    | 62                                | 74                                  | ENSSSCT0000000934/   | ENSSSCT00000002510/ENS   |
|                         |                         |                                   |                                     | ENSSSCT0000001927/   | SSCT00000006733/ENSSSC   |
|                         |                         |                                   |                                     | ENSSSCT0000002808/   | T00000008947/ENSSSCT000  |
|                         |                         |                                   |                                     | ENSSSCT0000006226/   | 00011053/ENSSSCT0000001  |
|                         |                         |                                   |                                     | ENSSSCT0000006699/   | 3322/ENSSSCT00000015061/ |
|                         |                         |                                   |                                     | ENSSSCT0000007534/   | ENSSSCT00000017282/ENS   |
|                         |                         |                                   |                                     | ENSSSCT0000009163/   | SSCT00000017523/ENSSSC   |
|                         |                         |                                   |                                     | ENSSSCT0000009164/   | T00000018501/ENSSSCT000  |
|                         |                         |                                   |                                     | ENSSSCT00000011308/  | 00018768/ENSSSCT0000001  |
|                         |                         |                                   |                                     | ENSSSCT00000011527/  | 9062/ENSSSCT00000024741/ |
|                         |                         |                                   |                                     | ENSSSCT00000013502/  | ENSSSCT00000024980/ENS   |
|                         |                         |                                   |                                     | ENSSSCT00000013571/  | SSCT00000027462/ENSSSC   |
|                         |                         |                                   |                                     | ENSSSCT00000014241/  | T00000028216/ENSSSCT000  |
|                         |                         |                                   |                                     | ENSSSCT00000014538/  | 00028884/ENSSSCT0000003  |
|                         |                         |                                   |                                     | ENSSSCT00000017392/  | 1202/ENSSSCT00000032277/ |
|                         |                         |                                   |                                     | ENSSSCT00000018381/  | ENSSSCT00000034484/ENS   |
|                         |                         |                                   |                                     | ENSSSCT00000019098/  | SSCT00000035032/ENSSSC   |
|                         |                         |                                   |                                     | ENSSSCT00000019681/  | T00000035292/ENSSSCT000  |
|                         |                         |                                   |                                     | ENSSSCT00000026451/  | 00035973/ENSSSCT0000003  |
|                         |                         |                                   |                                     | ENSSSCT00000027771/  | 5982/ENSSSCT00000036290/ |
|                         |                         |                                   |                                     | ENSSSCT00000029625/  | TCONS_00004796/TCONS_0   |
|                         |                         |                                   |                                     | ENSSSCT00000029905/  | 0005241/TCONS_00006314/  |
|                         |                         |                                   |                                     | ENSSSCT00000031122/  | TCONS_00006316/TCONS_0   |
|                         |                         |                                   |                                     | ENSSSCT00000034919/  | 0008348/TCONS_00011158/  |
|                         |                         |                                   |                                     | ENSSSCT00000036434/  | TCONS_00011474/TCONS_0   |
|                         |                         |                                   |                                     | TCONS_00001139/TCO   | 0012424/TCONS_00013318/  |
|                         |                         |                                   |                                     | NS_00004794/TCONS_   | TCONS_00013451/TCONS_0   |
|                         |                         |                                   |                                     | 00004931/TCONS_0000  | 0013452/TCONS_00015685/  |
|                         |                         |                                   |                                     | 7403/TCONS_00013396  | TCONS_00016536/TCONS_0   |
|                         |                         |                                   |                                     | /TCONS_00014448/TC   | 0017991/TCONS_00020520/  |
|                         |                         |                                   |                                     | ONS_00016859/TCONS   | TCONS_00022007/TCONS_0   |
|                         |                         |                                   |                                     | _00018210/TCONS_000  | 0028230/TCONS_00029348/  |
| 20459/TCONS_0002435     | TCONS_00032031/TCONS_0  |                                   |                                     |                      |                          |
| 5/TCONS_00028863/TC     | 0035093/TCONS_00038058/ |                                   |                                     |                      |                          |
| ONS_00032517/TCONS      | TCONS_00041695/TCONS_0  |                                   |                                     |                      |                          |
| _00033609/TCONS_000     | 0042856/TCONS_00045347/ |                                   |                                     |                      |                          |

|       |         |    |    |                     |                          |
|-------|---------|----|----|---------------------|--------------------------|
|       |         |    |    | 36842/TCONS_0004264 | TCONS_00045349/TCONS_0   |
|       |         |    |    | 2/TCONS_00045665/TC | 0045630/TCONS_00048384/  |
|       |         |    |    | ONS_00046597/TCONS  | TCONS_00049436/TCONS_0   |
|       |         |    |    | _00049007/TCONS_000 | 0052677/TCONS_00052953/  |
|       |         |    |    | 51555/TCONS_0005289 | TCONS_00068370/TCONS_0   |
|       |         |    |    | 4/TCONS_00055773/TC | 0076154/TCONS_00076744/  |
|       |         |    |    | ONS_00059949/TCONS  | TCONS_00078029/TCONS_0   |
|       |         |    |    | _00064907/TCONS_000 | 0081205/TCONS_00083246/  |
|       |         |    |    | 65482/TCONS_0006773 | TCONS_00084390/TCONS_0   |
|       |         |    |    | 3/TCONS_00075802/TC | 0084498/TCONS_00085534/  |
|       |         |    |    | ONS_00076786/TCONS  | TCONS_00085544/TCONS_0   |
|       |         |    |    | _00080151/TCONS_000 | 0092241/TCONS_00094370/  |
|       |         |    |    | 81239/TCONS_0008369 | TCONS_00098419/TCONS_0   |
|       |         |    |    | 4/TCONS_00087175/TC | 0100494/TCONS_00100510/  |
|       |         |    |    | ONS_00088728/TCONS  | TCONS_00100513/TCONS_0   |
|       |         |    |    | _00090200/TCONS_000 | 0100515/TCONS_00100528/  |
|       |         |    |    | 90930/TCONS_0009637 | TCONS_00100529/TCONS_0   |
|       |         |    |    | 6/TCONS_00098418/TC | 0100533                  |
|       |         |    |    | ONS_00099248        |                          |
| Biolo | rhythmi |    |    |                     | TCONS_00016536/TCONS_0   |
| gical | c       | 1  | 4  | TCONS_00095452      | 0020520/TCONS_00048384/  |
| Proce | process |    |    |                     | TCONS_00085534           |
| ss    |         |    |    |                     | ENSSSCT00000010229/ENS   |
|       |         |    |    |                     | SSCT00000018501/ENSSSC   |
|       |         |    |    | ENSSSCT00000003939/ | T00000027462/ENSSSCT000  |
|       |         |    |    | ENSSSCT00000027232/ | 00035973/TCONS_00003027/ |
|       |         |    |    | ENSSSCT00000031037/ | TCONS_00004822/TCONS_0   |
|       |         |    |    | TCONS_00004931/TCO  | 0006314/TCONS_00006316/  |
|       |         |    |    | NS_00010673/TCONS_  | TCONS_00006377/TCONS_0   |
|       |         |    |    | 00012908/TCONS_0001 | 0007428/TCONS_00008709/  |
|       |         |    |    | 6637/TCONS_00020459 | TCONS_00011158/TCONS_0   |
|       |         |    |    | /TCONS_00033609/TC  | 0016869/TCONS_00016870/  |
|       |         | 20 | 40 | ONS_00042642/TCONS  | TCONS_00017991/TCONS_0   |
|       |         |    |    | _00049007/TCONS_000 | 0024980/TCONS_00024981/  |
|       |         |    |    | 50395/TCONS_0005131 | TCONS_00028230/TCONS_0   |
|       |         |    |    | 1/TCONS_00055773/TC | 0031135/TCONS_00031548/  |
|       |         |    |    | ONS_00057499/TCONS  | TCONS_00035093/TCONS_0   |
|       |         |    |    | _00072374/TCONS_000 | 0035601/TCONS_00038058/  |
|       |         |    |    | 90200/TCONS_0009093 | TCONS_00045630/TCONS_0   |
|       |         |    |    | 0/TCONS_00095452/TC | 0045691/TCONS_00045692/  |
|       |         |    |    | ONS_00096376        | TCONS_00049436/TCONS_0   |
|       |         |    |    |                     | 0050770/TCONS_00052642/  |
|       |         |    |    |                     | TCONS_00053886/TCONS_0   |
| Biolo | develop |    |    |                     |                          |
| gical | mental  |    |    |                     |                          |
| Proce | process |    |    |                     |                          |
| ss    |         |    |    |                     |                          |

|                               |                                                                    |    |    |                                                                                                                                                                                                                                                                                                                                                                                                                                                                                                                                                                                                                                                                                                                                                                                                                                                                                                                 |
|-------------------------------|--------------------------------------------------------------------|----|----|-----------------------------------------------------------------------------------------------------------------------------------------------------------------------------------------------------------------------------------------------------------------------------------------------------------------------------------------------------------------------------------------------------------------------------------------------------------------------------------------------------------------------------------------------------------------------------------------------------------------------------------------------------------------------------------------------------------------------------------------------------------------------------------------------------------------------------------------------------------------------------------------------------------------|
|                               |                                                                    |    |    | 0054717/TCONS_00058416/<br>TCONS_00081205/TCONS_0<br>0084498/TCONS_00085534/<br>TCONS_00085544/TCONS_0<br>0092241/TCONS_00096230/<br>TCONS_00100528/TCONS_0<br>0100529<br>ENSSSCT00000005271/ENS<br>SSCT00000010229/ENSSSC<br>T00000013322/ENSSSCT000<br>00018768/ENSSSCT0000002<br>7462/ENSSSCT00000028216/<br>ENSSSCT00000030802/ENS<br>SSCT00000031202/ENSSSC<br>T00000035973/TCONS_0000<br>6377/TCONS_00008348/TCO<br>NS_00008709/TCONS_00011<br>158/TCONS_00016869/TCO<br>NS_00016870/TCONS_00020<br>520/TCONS_00022468/TCO<br>NS_00031548/TCONS_00035<br>410/TCONS_00035601/TCO<br>NS_00038058/TCONS_00041<br>695/TCONS_00045630/TCO<br>NS_00049436/TCONS_00052<br>677/TCONS_00052953/TCO<br>NS_00072603/TCONS_00073<br>850/TCONS_00077645/TCO<br>NS_00081205/TCONS_00084<br>552/TCONS_00085534/TCO<br>NS_00085544/TCONS_00090<br>841/TCONS_00096230/TCO<br>NS_00100501/TCONS_00100<br>528/TCONS_00100529 |
| Biolo<br>gical<br>Proce<br>ss | cellular<br>compo<br>nent<br>organiz<br>ation or<br>biogene<br>sis | 25 | 38 | ENSSSCT00000002808/<br>ENSSSCT00000011308/<br>ENSSSCT00000034919/<br>TCONS_00000968/TCO<br>NS_00004931/TCONS_<br>00009137/TCONS_0001<br>6637/TCONS_00025216<br>/TCONS_00028863/TC<br>ONS_00032517/TCONS<br>_00033609/TCONS_000<br>42642/TCONS_0004659<br>7/TCONS_00049538/TC<br>ONS_00050395/TCONS<br>_00051311/TCONS_000<br>51555/TCONS_0005577<br>3/TCONS_00062759/TC<br>ONS_00067733/TCONS<br>_00087195/TCONS_000<br>90200/TCONS_0009438<br>3/TCONS_00095452/TC<br>ONS_00096376                                                                                                                                                                                                                                                                                                                                                                                                                              |
| Biolo<br>gical<br>Proce<br>ss | hormon<br>e<br>secretio<br>n                                       | 0  | 1  | TCONS_00048384                                                                                                                                                                                                                                                                                                                                                                                                                                                                                                                                                                                                                                                                                                                                                                                                                                                                                                  |
| Biolo<br>gical<br>Proce<br>ss | reprodu<br>ctive<br>process                                        | 3  | 5  | TCONS_00033609/TCO<br>NS_00057499/TCONS_<br>00080151                                                                                                                                                                                                                                                                                                                                                                                                                                                                                                                                                                                                                                                                                                                                                                                                                                                            |
| Biolo<br>gical                | multice<br>llular                                                  | 18 | 37 | TCONS_00004931/TCO<br>NS_00010673/TCONS_                                                                                                                                                                                                                                                                                                                                                                                                                                                                                                                                                                                                                                                                                                                                                                                                                                                                        |

Proce organis  
ss mal  
process

00012908/TCONS\_0002 T00000035973/TCONS\_0000  
0459/TCONS\_00028503 3027/TCONS\_00004822/TCO  
/TCONS\_00029075/TC NS\_00006314/TCONS\_00006  
ONS\_00032517/TCONS 316/TCONS\_00007428/TCO  
\_00033609/TCONS\_000 NS\_00008709/TCONS\_00011  
42642/TCONS\_0004654 158/TCONS\_00016869/TCO  
1/TCONS\_00049007/TC NS\_00016870/TCONS\_00017  
ONS\_00051311/TCONS 991/TCONS\_00024980/TCO  
\_00057499/TCONS\_000 NS\_00024981/TCONS\_00028  
74295/TCONS\_0009020 230/TCONS\_00031548/TCO  
0/TCONS\_00090930/TC NS\_00035093/TCONS\_00035  
ONS\_00095452/TCONS 601/TCONS\_00038058/TCO  
\_00096376 NS\_00041695/TCONS\_00045  
630/TCONS\_00048384/TCO  
NS\_00049436/TCONS\_00050  
770/TCONS\_00052642/TCO  
NS\_00053886/TCONS\_00058  
416/TCONS\_00078029/TCO  
NS\_00081205/TCONS\_00084  
498/TCONS\_00085534/TCO  
NS\_00085544/TCONS\_00092  
241/TCONS\_00096230/TCO  
NS\_00100528/TCONS\_00100

529

ENSSSCT00000009859/ ENSSSCT00000002510/ENS  
ENSSSCT00000014241/ SSCT00000007604/ENSSSC  
ENSSSCT00000015384/ T00000008247/ENSSSCT000  
ENSSSCT00000018381/ 00009813/ENSSSCT0000001  
ENSSSCT00000023699/ 1053/ENSSSCT00000015576/  
ENSSSCT00000028237/ ENSSSCT00000017282/ENS  
ENSSSCT00000032662/ SSCT00000025648/ENSSSC  
ENSSSCT00000036440/ T00000026377/ENSSSCT000  
TCONS\_00000968/TCO 00033729/ENSSSCT0000003  
NS\_00001840/TCONS\_ 4484/ENSSSCT00000034640/  
00003237/TCONS\_0000 ENSSSCT00000035749/ENS  
4931/TCONS\_00009137 SSCT00000035973/ENSSSC  
/TCONS\_00010673/TC T00000035982/ENSSSCT000  
ONS\_00012908/TCONS 00036373/TCONS\_00003027/  
\_00018210/TCONS\_000 TCONS\_00003539/TCONS\_0  
18343/TCONS\_0002045 0004822/TCONS\_00007428/  
9/TCONS\_00021033/TC TCONS\_00008348/TCONS\_0  
ONS\_00029075/TCONS 0008709/TCONS\_00011158/  
\_00032517/TCONS\_000 TCONS\_00015685/TCONS\_0  
33609/TCONS\_0003393 0016536/TCONS\_00017991/

Biolo biologi  
gical cal  
Proce regulati  
ss on

45

77

7/TCONS\_00046541/TC TCONS\_00020520/TCONS\_0  
ONS\_00046597/TCONS 0021034/TCONS\_00022468/  
\_00049007/TCONS\_000 TCONS\_00024980/TCONS\_0  
49538/TCONS\_0004967 0024981/TCONS\_00025388/  
2/TCONS\_00051311/TC TCONS\_00028230/TCONS\_0  
ONS\_00055773/TCONS 0028709/TCONS\_00029348/  
\_00057499/TCONS\_000 TCONS\_00031135/TCONS\_0  
59949/TCONS\_0006314 0031328/TCONS\_00031548/  
7/TCONS\_00067733/TC TCONS\_00032179/TCONS\_0  
ONS\_00074295/TCONS 0035093/TCONS\_00035410/  
\_00076786/TCONS\_000 TCONS\_00038058/TCONS\_0  
80151/TCONS\_0008426 0041695/TCONS\_00042856/  
6/TCONS\_00087175/TC TCONS\_00045347/TCONS\_0  
ONS\_00091479/TCONS 0045349/TCONS\_00045630/  
\_00094383/TCONS\_000 TCONS\_00048384/TCONS\_0  
95452/TCONS\_0009637 0049436/TCONS\_00049673/  
6/TCONS\_00097159/TC TCONS\_00052642/TCONS\_0  
ONS\_00099248 0052677/TCONS\_00052953/  
TCONS\_00054717/TCONS\_0  
0058416/TCONS\_00065835/  
TCONS\_00068370/TCONS\_0  
0072603/TCONS\_00073850/  
TCONS\_00076744/TCONS\_0  
0077645/TCONS\_00081205/  
TCONS\_00083743/TCONS\_0  
0084498/TCONS\_00084552/  
TCONS\_00085534/TCONS\_0  
0085544/TCONS\_00086748/  
TCONS\_00090841/TCONS\_0  
0092241/TCONS\_00094370/  
TCONS\_00096230/TCONS\_0  
0100501/TCONS\_00100513/  
TCONS\_00100515/TCONS\_0  
0100528/TCONS\_00100529

|                      |                  |    |     |                                                                                                                                        |                                                                                                                                                              |
|----------------------|------------------|----|-----|----------------------------------------------------------------------------------------------------------------------------------------|--------------------------------------------------------------------------------------------------------------------------------------------------------------|
| Biological Processes | growth           | 2  | 3   | TCONS_00033609/TCO<br>NS_00096376                                                                                                      | TCONS_00050770/TCONS_0<br>0100528/TCONS_00100529                                                                                                             |
| Biological Processes | cellular process | 79 | 118 | ENSSSCT00000000934/<br>ENSSSCT00000002808/<br>ENSSSCT00000006699/<br>ENSSSCT00000007534/<br>ENSSSCT00000009859/<br>ENSSSCT00000011308/ | ENSSSCT00000002510/ENS<br>SSCT00000005271/ENSSSC<br>T00000007604/ENSSSCT000<br>00008247/ENSSSCT0000000<br>8947/ENSSSCT00000009813/<br>ENSSSCT00000010229/ENS |

ENSSSCT00000011527/ SSCT00000011053/ENSSSC  
ENSSSCT00000013502/ T00000013322/ENSSSCT000  
ENSSSCT00000013571/ 00015061/ENSSSCT0000001  
ENSSSCT00000014241/ 5576/ENSSSCT00000017282/  
ENSSSCT00000014538/ ENSSSCT00000017523/ENS  
ENSSSCT00000015384/ SSCT00000018501/ENSSSC  
ENSSSCT00000015449/ T00000018768/ENSSSCT000  
ENSSSCT00000017392/ 00019062/ENSSSCT0000002  
ENSSSCT00000018381/ 4741/ENSSSCT00000024980/  
ENSSSCT00000019098/ ENSSSCT00000025648/ENS  
ENSSSCT00000019681/ SSCT00000026377/ENSSSC  
ENSSSCT00000026451/ T00000027462/ENSSSCT000  
ENSSSCT00000027771/ 00027869/ENSSSCT0000002  
ENSSSCT00000029625/ 8216/ENSSSCT00000028884/  
ENSSSCT00000029905/ ENSSSCT00000031202/ENS  
ENSSSCT00000031037/ SSCT00000032277/ENSSSC  
ENSSSCT00000031122/ T00000033729/ENSSSCT000  
ENSSSCT00000031428/ 00034484/ENSSSCT0000003  
ENSSSCT00000032662/ 4640/ENSSSCT00000035032/  
ENSSSCT00000034919/ ENSSSCT00000035749/ENS  
ENSSSCT00000036434/ SSCT00000035973/ENSSSC  
ENSSSCT00000036440/ T00000035982/ENSSSCT000  
TCONS\_00000968/TCO 00036290/ENSSSCT0000003  
NS\_00001139/TCONS\_ 6373/TCONS\_00003027/TCO  
00001840/TCONS\_0000 NS\_00004594/TCONS\_00004  
3237/TCONS\_00004794 796/TCONS\_00004822/TCO  
/TCONS\_00004931/TC NS\_00005241/TCONS\_00006  
ONS\_00009137/TCONS 314/TCONS\_00006316/TCO  
\_00012908/TCONS\_000 NS\_00006377/TCONS\_00008  
13396/TCONS\_0001663 348/TCONS\_00008709/TCO  
7/TCONS\_00016859/TC NS\_00011158/TCONS\_00012  
ONS\_00018210/TCONS 424/TCONS\_00013318/TCO  
\_00020459/TCONS\_000 NS\_00013451/TCONS\_00013  
24355/TCONS\_0002521 452/TCONS\_00014951/TCO  
6/TCONS\_00028863/TC NS\_00015685/TCONS\_00016  
ONS\_00032517/TCONS 536/TCONS\_00016869/TCO  
\_00033609/TCONS\_000 NS\_00016870/TCONS\_00017  
33937/TCONS\_0003684 991/TCONS\_00020222/TCO  
2/TCONS\_00042642/TC NS\_00020520/TCONS\_00022  
ONS\_00045665/TCONS 007/TCONS\_00022468/TCO  
\_00046597/TCONS\_000 NS\_00024980/TCONS\_00024  
49007/TCONS\_0004953 981/TCONS\_00025388/TCO  
8/TCONS\_00050395/TC NS\_00028230/TCONS\_00029  
ONS\_00051311/TCONS 348/TCONS\_00031328/TCO



\_00055773/TCONS\_000 NS\_00031548/TCONS\_00032  
 57499/TCONS\_0005994 031/TCONS\_00035093/TCO  
 9/TCONS\_00062759/TC NS\_00035410/TCONS\_00035  
 ONS\_00063147/TCONS 601/TCONS\_00036864/TCO  
 \_00064907/TCONS\_000 NS\_00038058/TCONS\_00041  
 65482/TCONS\_0006773 695/TCONS\_00042856/TCO  
 3/TCONS\_00074295/TC NS\_00045347/TCONS\_00045  
 ONS\_00075802/TCONS 349/TCONS\_00045630/TCO  
 \_00076786/TCONS\_000 NS\_00045691/TCONS\_00045  
 80151/TCONS\_0008123 692/TCONS\_00048384/TCO  
 9/TCONS\_00083694/TC NS\_00049436/TCONS\_00049  
 ONS\_00087175/TCONS 673/TCONS\_00050770/TCO  
 \_00087195/TCONS\_000 NS\_00052642/TCONS\_00052  
 88728/TCONS\_0009020 677/TCONS\_00052953/TCO  
 0/TCONS\_00090930/TC NS\_00053886/TCONS\_00054  
 ONS\_00094383/TCONS 717/TCONS\_00058416/TCO  
 \_00095452/TCONS\_000 NS\_00060620/TCONS\_00068  
 96376/TCONS\_0009841 370/TCONS\_00072603/TCO  
 8/TCONS\_00099248 NS\_00073850/TCONS\_00076  
 744/TCONS\_00077645/TCO  
 NS\_00078029/TCONS\_00081  
 205/TCONS\_00083743/TCO  
 NS\_00084390/TCONS\_00084  
 498/TCONS\_00084552/TCO  
 NS\_00085534/TCONS\_00085  
 544/TCONS\_00086748/TCO  
 NS\_00090841/TCONS\_00092  
 241/TCONS\_00094370/TCO  
 NS\_00096230/TCONS\_00098  
 419/TCONS\_00100494/TCO  
 NS\_00100501/TCONS\_00100  
 510/TCONS\_00100513/TCO  
 NS\_00100515/TCONS\_00100  
 528/TCONS\_00100529/TCO  
 NS\_00100533

|       |          |    |    |                     |                          |
|-------|----------|----|----|---------------------|--------------------------|
| Biolo | behavior | 3  | 2  | TCONS_00029075/TCO  | TCONS_00038058/TCONS_0   |
| Proce | r        |    |    | NS_00090930/TCONS_  | 0041695                  |
| ss    |          |    |    | 00097159            |                          |
| Biolo | single-  |    |    | ENSSSCT00000000934/ | ENSSSCT00000002510/ENS   |
| gical | organis  |    |    | ENSSSCT00000001927/ | SSCT00000006733/ENSSSC   |
| Proce | m        | 65 | 94 | ENSSSCT00000009163/ | T00000007604/ENSSSCT000  |
| ss    | process  |    |    | ENSSSCT00000009164/ | 00008247/ENSSSCT0000000  |
|       |          |    |    | ENSSSCT00000009859/ | 9813/ENSSSCT00000010229/ |

ENSSSCT00000011308/ ENSSSCT00000011053/ENS  
ENSSSCT00000011527/ SSCT00000015576/ENSSSC  
ENSSSCT00000014241/ T00000017282/ENSSSCT000  
ENSSSCT00000015384/ 00018501/ENSSSCT0000002  
ENSSSCT00000015449/ 5648/ENSSSCT00000026377/  
ENSSSCT00000017392/ ENSSSCT00000027462/ENS  
ENSSSCT00000018381/ SSCT00000027869/ENSSSC  
ENSSSCT00000019098/ T00000028884/ENSSSCT000  
ENSSSCT00000019681/ 00033729/ENSSSCT0000003  
ENSSSCT00000027771/ 4484/ENSSSCT00000034640/  
ENSSSCT00000029625/ ENSSSCT00000035292/ENS  
ENSSSCT00000031037/ SSCT00000035749/ENSSSC  
ENSSSCT00000031428/ T00000035973/ENSSSCT000  
ENSSSCT00000032662/ 00035982/ENSSSCT0000003  
ENSSSCT00000036434/ 6373/TCONS\_00003027/TCO  
ENSSSCT00000036440/ NS\_00003539/TCONS\_00004  
TCONS\_00001840/TCO 594/TCONS\_00004822/TCO  
NS\_00003237/TCONS\_ NS\_00006314/TCONS\_00006  
00004931/TCONS\_0000 316/TCONS\_00006377/TCO  
9137/TCONS\_00010673 NS\_00007428/TCONS\_00008  
/TCONS\_00012908/TC 348/TCONS\_00008709/TCO  
ONS\_00014448/TCONS NS\_00011158/TCONS\_00012  
\_00016637/TCONS\_000 424/TCONS\_00014951/TCO  
18210/TCONS\_0002045 NS\_00016869/TCONS\_00016  
9/TCONS\_00025216/TC 870/TCONS\_00017991/TCO  
ONS\_00028503/TCONS NS\_00020222/TCONS\_00020  
\_00028863/TCONS\_000 520/TCONS\_00022468/TCO  
29075/TCONS\_0003251 NS\_00024980/TCONS\_00024  
7/TCONS\_00033609/TC 981/TCONS\_00025388/TCO  
ONS\_00033937/TCONS NS\_00028230/TCONS\_00031  
\_00036842/TCONS\_000 135/TCONS\_00031328/TCO  
42642/TCONS\_0004654 NS\_00031548/TCONS\_00035  
1/TCONS\_00049007/TC 093/TCONS\_00035410/TCO  
ONS\_00050395/TCONS NS\_00035601/TCONS\_00036  
\_00051311/TCONS\_000 864/TCONS\_00038058/TCO  
51555/TCONS\_0005289 NS\_00041695/TCONS\_00042  
4/TCONS\_00055773/TC 856/TCONS\_00045347/TCO  
ONS\_00057499/TCONS NS\_00045349/TCONS\_00045  
\_00059949/TCONS\_000 630/TCONS\_00045691/TCO  
62759/TCONS\_0006314 NS\_00045692/TCONS\_00048  
7/TCONS\_00067733/TC 384/TCONS\_00049436/TCO  
ONS\_00072374/TCONS NS\_00049673/TCONS\_00050  
\_00074295/TCONS\_000 770/TCONS\_00052642/TCO  
80151/TCONS\_0008123 NS\_00052677/TCONS\_00052

|                      |                       |    |    |                                                                                                                                                                             |                                                                                                                                                                                                                                                                                                                                                                                                          |
|----------------------|-----------------------|----|----|-----------------------------------------------------------------------------------------------------------------------------------------------------------------------------|----------------------------------------------------------------------------------------------------------------------------------------------------------------------------------------------------------------------------------------------------------------------------------------------------------------------------------------------------------------------------------------------------------|
|                      |                       |    |    | 9/TCONS_00083694/TCONS_00087195/TCONS_00090200/TCONS_00090930/TCONS_00091479/TCONS_00094383/TCONS_00095452/TCONS_00096376/TCONS_00097159                                    | 953/TCONS_00053886/TCONS_00054717/TCONS_00058416/TCONS_00060620/TCONS_00065835/TCONS_0006789/TCONS_00068370/TCONS_00072603/TCONS_00073850/TCONS_00076154/TCONS_00077645/TCONS_00078029/TCONS_00081205/TCONS_00083743/TCONS_00084498/TCONS_00085534/TCONS_00085544/TCONS_00086748/TCONS_00090841/TCONS_00092241/TCONS_00094370/TCONS_00096230/TCONS_00100501/TCONS_00100510/TCONS_00100528/TCONS_00100529 |
| Biological Processes | immune system process | 9  | 10 | ENSSSCT00000001329/ENSSSCT00000009461/ENSSSCT00000009859/ENSSSCT00000010832/ENSSSCT00000014800/TCONS_00001840/TCONS_00033937/TCONS_00049007/TCONS_00063147                  | ENSSSCT00000009813/ENSSSCT00000033729/ENSSSCT00000034640/ENSSSCT0000035973/TCONS_00004822/TCONS_00007428/TCONS_00031548/TCONS_00045630/TCONS_00085534/TCONS_00085544                                                                                                                                                                                                                                     |
| Biological Processes | locomotion            | 2  | 11 | ENSSSCT00000029625/TCONS_00051311                                                                                                                                           | ENSSSCT00000009813/ENSSSCT00000034640/TCONS_00014951/TCONS_00031548/TCONS_00038058/TCONS_00052953/TCONS_00054717/TCONS_00085534/TCONS_00085544/TCONS_00100528/TCONS_00100529                                                                                                                                                                                                                             |
| Biological Processes | localization          | 27 | 33 | ENSSSCT00000003939/ENSSSCT00000008741/ENSSSCT00000011308/ENSSSCT00000015449/ENSSSCT00000017392/ENSSSCT00000018381/ENSSSCT00000019098/ENSSSCT00000027232/ENSSSCT00000028237/ | ENSSSCT00000009813/ENSSSCT00000015576/ENSSSCT00000027462/ENSSSCT00000030027869/ENSSSCT00000030802/ENSSSCT00000034640/ENSSSCT00000035973/TCONS_00003539/TCONS_00004822/TCONS_00008348/TCONS_00008709/TCONS_00011                                                                                                                                                                                          |

|       |         |    |    |                     |                          |
|-------|---------|----|----|---------------------|--------------------------|
|       |         |    |    | ENSSSCT00000029625/ | 158/TCONS_00014951/TCO   |
|       |         |    |    | ENSSSCT00000031428/ | NS_00015685/TCONS_00020  |
|       |         |    |    | ENSSSCT00000036440/ | 222/TCONS_00020520/TCO   |
|       |         |    |    | ENSSSCT00000036536/ | NS_00022468/TCONS_00036  |
|       |         |    |    | TCONS_00007403/TCO  | 864/TCONS_00038058/TCO   |
|       |         |    |    | NS_00013396/TCONS_  | NS_00045630/TCONS_00048  |
|       |         |    |    | 00018210/TCONS_0002 | 384/TCONS_00050770/TCO   |
|       |         |    |    | 5216/TCONS_00028503 | NS_00052953/TCONS_00054  |
|       |         |    |    | /TCONS_00037492/TC  | 717/TCONS_00058416/TCO   |
|       |         |    |    | ONS_00046541/TCONS  | NS_00066789/TCONS_00068  |
|       |         |    |    | _00049538/TCONS_000 | 370/TCONS_00083743/TCO   |
|       |         |    |    | 50395/TCONS_0005749 | NS_00084552/TCONS_00085  |
|       |         |    |    | 9/TCONS_00063147/TC | 544/TCONS_00096230/TCO   |
|       |         |    |    | ONS_00072374/TCONS  | NS_00100528/TCONS_00100  |
|       |         |    |    | _00080151/TCONS_000 | 529                      |
|       |         |    |    | 91479               |                          |
|       |         |    |    |                     | ENSSSCT00000004436/ENS   |
|       |         |    |    |                     | SSCT00000005288/ENSSSC   |
| Biolo | biologi |    |    | ENSSSCT00000016780/ | T00000007604/ENSSSCT000  |
| gical | cal     |    |    | ENSSSCT00000032593/ | 00017016/ENSSSCT0000003  |
| Proce | adhesio | 4  | 9  | TCONS_00074295/TCO  | 0852/TCONS_00008709/TCO  |
| ss    | n       |    |    | NS_00094383         | NS_00031548/TCONS_00035  |
|       |         |    |    |                     | 093/TCONS_00085544       |
| Biolo | reprodu |    |    |                     | ENSSSCT00000035973/TCO   |
| gical | ction   |    |    | TCONS_00033609      | NS_00053886/TCONS_00085  |
| Proce |         | 1  | 4  |                     | 534/TCONS_00085544       |
| ss    |         |    |    |                     |                          |
| Biolo | multi-  |    |    |                     | TCONS_00049436/TCONS_0   |
| gical | organis |    |    | TCONS_00003237/TCO  | 0053886/TCONS_00073850/  |
| Proce | m       | 2  | 5  | NS_00033609         | TCONS_00085544/TCONS_0   |
| ss    | process |    |    |                     | 0100501                  |
|       |         |    |    | ENSSSCT00000009461/ | ENSSSCT00000002510/ENS   |
|       |         |    |    | ENSSSCT00000009859/ | SSCT00000005288/ENSSSC   |
|       |         |    |    | ENSSSCT00000010832/ | T00000007604/ENSSSCT000  |
|       |         |    |    | ENSSSCT00000014241/ | 00008247/ENSSSCT0000000  |
|       |         |    |    | ENSSSCT00000014800/ | 9813/ENSSSCT00000011053/ |
|       |         |    |    | ENSSSCT00000015384/ | ENSSSCT00000017282/ENS   |
| Biolo | respons |    |    | ENSSSCT00000031972/ | SSCT00000025648/ENSSSC   |
| gical | e to    |    |    | ENSSSCT00000032662/ | T00000026377/ENSSSCT000  |
| Proce | stimulu | 25 | 54 | TCONS_00001840/TCO  | 00033729/ENSSSCT0000003  |
| ss    | s       |    |    | NS_00003237/TCONS_  | 4484/ENSSSCT00000034640/ |
|       |         |    |    | 00009137/TCONS_0002 | ENSSSCT00000035749/ENS   |
|       |         |    |    | 0459/TCONS_00029075 | SSCT00000035973/ENSSSC   |
|       |         |    |    | /TCONS_00033609/TC  | T00000035982/ENSSSCT000  |

Biological  
Processes

signaling

13

43

ONS\_00033937/TCONS\_00049007/TCONS\_00051311/TCONS\_00051555/TCONS\_00057499/TCONS\_00059949/TCONS\_00076786/TCONS\_00080151/TCONS\_00084266/TCONS\_00090200/TCONS\_00096376

00036373/TCONS\_00003027/TCONS\_00004822/TCONS\_0008348/TCONS\_00011158/TCONS\_00015685/TCONS\_00016536/TCONS\_00016869/TCONS\_00020520/TCONS\_00022468/TCONS\_00024980/TCONS\_00024981/TCONS\_00025388/TCONS\_00028230/TCONS\_00031328/TCONS\_00031548/TCONS\_00035410/TCONS\_00038058/TCONS\_00041695/TCONS\_00042856/TCONS\_00045347/TCONS\_00045349/TCONS\_00045630/TCONS\_00048384/TCONS\_00049436/TCONS\_00049673/TCONS\_00052642/TCONS\_00052953/TCONS\_00054717/TCONS\_00072603/TCONS\_00084498/TCONS\_00085534/TCONS\_00085544/TCONS\_00090841/TCONS\_00092241/TCONS\_00094370/TCONS\_00100501/TCONS\_00100528/TCONS\_00100529

ENSSSCT00000002510/ENSSSCT00000007604/ENSSSCT00000008247/ENSSSCT00000009859/ENSSSCT00000014241/ENSSSCT00000015384/ENSSSCT00000032662/TCONS\_00001840/TCONS\_00003237/TCONS\_00020459/TCONS\_00033609/TCONS\_00033937/TCONS\_00049007/TCONS\_00057499/TCONS\_00074295/TCONS\_00096376

00009813/ENSSSCT00000011053/ENSSSCT00000017282/ENSSSCT00000025648/ENSSSCT00000026377/ENSSSCT00000033729/ENSSSCT000034484/ENSSSCT00000034640/ENSSSCT00000035749/ENSSSCT00000035973/ENSSSCT00000035982/ENSSSCT00000036373/TCONS\_00011158/TCONS\_00024980/TCONS\_00024981/TCONS\_00025388/TCONS\_00028230/TCONS\_00031328/TCONS\_00031548/TCONS\_00035410/TCONS\_00038058/TCONS\_00041695/TCONS\_00042856/TCONS\_00045347/TCONS\_00045349/TCONS\_00045630/TCONS\_00048384/TCONS\_00049436/TCONS\_00049673/TCONS\_00052642/TCONS\_00052953/TCONS\_00054717/TCONS\_00072603/TCONS\_00084498/TCONS\_00085534/TCONS\_00085544/TCONS\_00090841/TCONS\_00092241/TCONS\_00094370/TCONS\_00100501/TCONS\_00100528/TCONS\_00100529

NS\_00038058/TCONS\_00041  
695/TCONS\_00042856/TCO  
NS\_00045347/TCONS\_00045  
349/TCONS\_00048384/TCO  
NS\_00049436/TCONS\_00049  
673/TCONS\_00052642/TCO  
NS\_00054717/TCONS\_00072  
603/TCONS\_00084498/TCO  
NS\_00085534/TCONS\_00085  
544/TCONS\_00090841/TCO  
NS\_00092241/TCONS\_00096  
230/TCONS\_00100501/TCO  
NS\_00100528/TCONS\_00100

529

ENSSSCT0000000934/ ENSSSCT00000006733/ENS  
ENSSSCT0000001927/ SSCT00000008247/ENSSSC  
ENSSSCT0000002252/ T00000011053/ENSSSCT000  
ENSSSCT00000006699/ 00013322/ENSSSCT0000001  
ENSSSCT00000006967/ 6707/ENSSSCT00000017523/  
ENSSSCT00000009163/ ENSSSCT00000018236/ENS  
ENSSSCT00000009164/ SSCT00000018501/ENSSSC  
ENSSSCT00000009375/ T00000023398/ENSSSCT000  
ENSSSCT00000010832/ 00024741/ENSSSCT0000002  
ENSSSCT00000011308/ 7462/ENSSSCT00000028542/  
ENSSSCT00000013502/ ENSSSCT00000028884/ENS  
ENSSSCT00000013571/ SSCT00000030802/ENSSSC  
ENSSSCT00000014538/ T00000031950/ENSSSCT000  
ENSSSCT00000015432/ 00034484/ENSSSCT0000003  
ENSSSCT00000015449/ 5032/ENSSSCT00000035292/  
ENSSSCT00000018381/ ENSSSCT00000035982/TCO  
ENSSSCT00000019681/ NS\_00002883/TCONS\_00003  
ENSSSCT00000019687/ 027/TCONS\_00004796/TCO  
ENSSSCT00000022502/ NS\_00005241/TCONS\_00006  
ENSSSCT00000023318/ 314/TCONS\_00006316/TCO  
ENSSSCT00000023699/ NS\_00008348/TCONS\_00008  
ENSSSCT00000027771/ 709/TCONS\_00011474/TCO  
ENSSSCT00000028237/ NS\_00012424/TCONS\_00013  
ENSSSCT00000029625/ 318/TCONS\_00013452/TCO  
ENSSSCT00000029905/ NS\_00014076/TCONS\_00016  
ENSSSCT00000030903/ 536/TCONS\_00022007/TCO  
ENSSSCT00000031122/ NS\_00028230/TCONS\_00029  
ENSSSCT00000033745/ 348/TCONS\_00032031/TCO  
ENSSSCT00000036434/ NS\_00041695/TCONS\_00042  
ENSSSCT00000036440/ 856/TCONS\_00048384/TCO

Mole  
cular  
Funct  
ion

catalyti  
c  
activity

68

60

TCONS\_00001139/TCO NS\_00049436/TCONS\_00052  
 NS\_00001244/TCONS\_ 677/TCONS\_00052953/TCO  
 00004794/TCONS\_0000 NS\_00068370/TCONS\_00076  
 4931/TCONS\_00007403 154/TCONS\_00078029/TCO  
 /TCONS\_00010927/TC NS\_00083246/TCONS\_00084  
 ONS\_00012870/TCONS 390/TCONS\_00084498/TCO  
 \_00014448/TCONS\_000 NS\_00085534/TCONS\_00085  
 16859/TCONS\_0001821 544/TCONS\_00086748/TCO  
 0/TCONS\_00020459/TC NS\_00094370/TCONS\_00098  
 ONS\_00024355/TCONS 419/TCONS\_00100494/TCO  
 \_00028863/TCONS\_000 NS\_00100501/TCONS\_00100  
 32517/TCONS\_0003316 510/TCONS\_00100528/TCO  
 7/TCONS\_00033609/TC NS\_00100529/TCONS\_00100  
 ONS\_00036842/TCONS 533  
 \_00037171/TCONS\_000  
 42642/TCONS\_0004566  
 5/TCONS\_00049007/TC  
 ONS\_00051555/TCONS  
 \_00052894/TCONS\_000  
 55773/TCONS\_0005927  
 8/TCONS\_00059949/TC  
 ONS\_00064907/TCONS  
 \_00065482/TCONS\_000  
 67733/TCONS\_0007580  
 2/TCONS\_00081239/TC  
 ONS\_00083694/TCONS  
 \_00088728/TCONS\_000  
 90200/TCONS\_0009093  
 0/TCONS\_00096376/TC  
 ONS\_00098418/TCONS  
 \_00099248  
 ENSSSCT00000000934/ ENSSSCT00000000144/ENS  
 ENSSSCT00000002812/ SSCT00000002510/ENSSSC  
 ENSSSCT00000003939/ T00000002650/ENSSSCT000  
 ENSSSCT00000004174/ 00002713/ENSSSCT0000000  
 ENSSSCT00000006226/ 4436/ENSSSCT00000005271/  
 ENSSSCT00000006699/ ENSSSCT00000005288/ENS  
 ENSSSCT00000006706/ SSCT00000005633/ENSSSC  
 ENSSSCT00000007206/ T00000006644/ENSSSCT000  
 ENSSSCT00000007534/ 00006733/ENSSSCT0000000  
 ENSSSCT00000008741/ 7604/ENSSSCT00000008247/  
 ENSSSCT00000010013/ ENSSSCT00000008947/ENS  
 ENSSSCT00000010832/ SSCT00000010229/ENSSSC  
 ENSSSCT00000011527/ T00000011679/ENSSSCT000

Mole  
 cular  
 Funct  
 ion

binding

84

113

ENSSSCT00000012400/ 00013322/ENSSSCT0000001  
ENSSSCT00000012465/ 3323/ENSSSCT00000015061/  
ENSSSCT00000013502/ ENSSSCT00000015660/ENS  
ENSSSCT00000014241/ SSCT00000015663/ENSSSC  
ENSSSCT00000014538/ T00000017282/ENSSSCT000  
ENSSSCT00000015432/ 00017523/ENSSSCT0000001  
ENSSSCT00000023318/ 8236/ENSSSCT00000018768/  
ENSSSCT00000025191/ ENSSSCT00000019062/ENS  
ENSSSCT00000027232/ SSCT00000019601/ENSSSC  
ENSSSCT00000030903/ T00000024980/ENSSSCT000  
ENSSSCT00000031037/ 00027235/ENSSSCT0000002  
ENSSSCT00000031122/ 8216/ENSSSCT00000028542/  
ENSSSCT00000034919/ ENSSSCT00000028884/ENS  
ENSSSCT00000036440/ SSCT00000030802/ENSSSC  
ENSSSCT00000036536/ T00000031202/ENSSSCT000  
TCONS\_00000968/TCO 00031950/ENSSSCT0000003  
NS\_00001840/TCONS\_ 2277/ENSSSCT00000032649/  
00004931/TCONS\_0001 ENSSSCT00000034484/ENS  
0673/TCONS\_00012870 SSCT00000035485/ENSSSC  
/TCONS\_00012908/TC T00000035876/ENSSSCT000  
ONS\_00013396/TCONS 00035973/ENSSSCT0000003  
\_00014448/TCONS\_000 6290/TCONS\_00003027/TCO  
16637/TCONS\_0001821 NS\_00004822/TCONS\_00007  
0/TCONS\_00018343/TC 428/TCONS\_00008348/TCO  
ONS\_00020459/TCONS NS\_00008709/TCONS\_00011  
\_00021033/TCONS\_000 158/TCONS\_00012424/TCO  
24355/TCONS\_0002521 NS\_00014951/TCONS\_00015  
6/TCONS\_00028187/TC 685/TCONS\_00016536/TCO  
ONS\_00028863/TCONS NS\_00016869/TCONS\_00017  
\_00029075/TCONS\_000 991/TCONS\_00020520/TCO  
32517/TCONS\_0003316 NS\_00021034/TCONS\_00022  
7/TCONS\_00033609/TC 007/TCONS\_00024980/TCO  
ONS\_00033937/TCONS NS\_00024981/TCONS\_00025  
\_00034199/TCONS\_000 388/TCONS\_00028230/TCO  
37171/TCONS\_0004566 NS\_00029348/TCONS\_00029  
5/TCONS\_00046597/TC 651/TCONS\_00031135/TCO  
ONS\_00049007/TCONS NS\_00031328/TCONS\_00031  
\_00049538/TCONS\_000 548/TCONS\_00032179/TCO  
49672/TCONS\_0005131 NS\_00035093/TCONS\_00035  
1/TCONS\_00051555/TC 410/TCONS\_00035601/TCO  
ONS\_00052894/TCONS NS\_00037624/TCONS\_00038  
\_00055773/TCONS\_000 058/TCONS\_00041695/TCO  
57499/TCONS\_0005834 NS\_00042856/TCONS\_00045  
5/TCONS\_00059949/TC 349/TCONS\_00045630/TCO





|                    |                                                                          |   |    |                                                                                                                                                                                            |                                                                                                                                                                                       |
|--------------------|--------------------------------------------------------------------------|---|----|--------------------------------------------------------------------------------------------------------------------------------------------------------------------------------------------|---------------------------------------------------------------------------------------------------------------------------------------------------------------------------------------|
| Molecular Function | channel regulator activity protein binding transcription factor activity | 1 | 1  | TCONS_00033609                                                                                                                                                                             | TCONS_00008348                                                                                                                                                                        |
| Molecular Function | binding transcription factor activity                                    | 2 | 5  | TCONS_00018343/TCO<br>NS_00095452                                                                                                                                                          | ENSSSCT00000036290/TCO<br>NS_00020520/TCONS_00048<br>384/TCONS_00052953/TCO<br>NS_00092241                                                                                            |
| Molecular Function | transporter activity                                                     | 9 | 10 | ENSSSCT00000015449/<br>ENSSSCT00000017392/<br>ENSSSCT00000019098/<br>ENSSSCT00000031428/<br>ENSSSCT00000036440/<br>TCONS_00046541/TCO<br>NS_00057499/TCONS_<br>00080151/TCONS_0009<br>1479 | ENSSSCT00000015576/ENS<br>SSCT00000027869/TCONS_<br>00004822/TCONS_00020222/<br>TCONS_00022468/TCONS_0<br>0036864/TCONS_00045630/<br>TCONS_00050770/TCONS_0<br>0068370/TCONS_00083743 |
| Molecular Function | structural molecule activity                                             | 1 | 7  | ENSSSCT00000002808                                                                                                                                                                         | ENSSSCT00000008947/ENS<br>SSCT00000018768/ENSSSC<br>T00000019062/ENSSSCT000<br>00027298/ENSSSCT0000002<br>8216/ENSSSCT00000031509/<br>TCONS_00016869                                  |
| Molecular Function | guanylnucleotide exchange factor activity                                | 1 | 1  | TCONS_00009137                                                                                                                                                                             | TCONS_00073850                                                                                                                                                                        |
| Molecular Function | lar function regulator                                                   | 7 | 4  | ENSSSCT00000014800/<br>ENSSSCT00000026451/<br>TCONS_00009137/TCO<br>NS_00033609/TCONS_<br>00080151/TCONS_0008<br>4266/TCONS_00094383                                                       | ENSSSCT00000025648/TCO<br>NS_00008348/TCONS_00032<br>179/TCONS_00073850                                                                                                               |
| Molecular Function | enzyme regulator activity                                                | 5 | 2  | ENSSSCT00000014800/<br>ENSSSCT00000026451/<br>TCONS_00080151/TCO<br>NS_00084266/TCONS_<br>00094383                                                                                         | ENSSSCT00000025648/TCO<br>NS_00032179                                                                                                                                                 |

|                               |                                             |    |    |                                                                                                                                                                                                                                                                                                                                                                                                                                                                                                                                                                                                                                                                                                                                   |                                                                                                                                                                                                                                                                                                                                                                                                                                                                                                                                                                                                                                                                                                                                                                                                                                                         |
|-------------------------------|---------------------------------------------|----|----|-----------------------------------------------------------------------------------------------------------------------------------------------------------------------------------------------------------------------------------------------------------------------------------------------------------------------------------------------------------------------------------------------------------------------------------------------------------------------------------------------------------------------------------------------------------------------------------------------------------------------------------------------------------------------------------------------------------------------------------|---------------------------------------------------------------------------------------------------------------------------------------------------------------------------------------------------------------------------------------------------------------------------------------------------------------------------------------------------------------------------------------------------------------------------------------------------------------------------------------------------------------------------------------------------------------------------------------------------------------------------------------------------------------------------------------------------------------------------------------------------------------------------------------------------------------------------------------------------------|
|                               |                                             |    |    |                                                                                                                                                                                                                                                                                                                                                                                                                                                                                                                                                                                                                                                                                                                                   | ENSSSCT00000002510/ENS<br>SSCT00000008247/ENSSSC<br>T00000017282/ENSSSCT000<br>00033729/ENSSSCT0000003                                                                                                                                                                                                                                                                                                                                                                                                                                                                                                                                                                                                                                                                                                                                                  |
| Mole<br>cular<br>Funct<br>ion | molecu<br>lar<br>transdu<br>cer<br>activity | 5  | 18 | ENSSSCT00000009859/<br>ENSSSCT00000014241/<br>ENSSSCT00000032662/<br>TCONS_00003237/TCO<br>NS_00028503                                                                                                                                                                                                                                                                                                                                                                                                                                                                                                                                                                                                                            | 4484/ENSSSCT00000035982/<br>TCONS_00011158/TCONS_0<br>0020520/TCONS_00031548/<br>TCONS_00038058/TCONS_0<br>0041695/TCONS_00042856/<br>TCONS_00048384/TCONS_0<br>0049436/TCONS_00049673/<br>TCONS_00083743/TCONS_0<br>0085534/TCONS_00085544                                                                                                                                                                                                                                                                                                                                                                                                                                                                                                                                                                                                             |
|                               |                                             |    |    | ENSSSCT00000002252/<br>ENSSSCT00000002808/<br>ENSSSCT00000007534/<br>ENSSSCT00000009461/<br>ENSSSCT00000011308/<br>ENSSSCT00000013502/<br>ENSSSCT00000014241/<br>ENSSSCT00000015449/<br>ENSSSCT00000016961/<br>ENSSSCT00000018381/<br>ENSSSCT00000019681/<br>ENSSSCT00000019687/<br>ENSSSCT00000027771/<br>ENSSSCT00000028237/<br>ENSSSCT00000029905/<br>ENSSSCT00000031037/<br>ENSSSCT00000031122/<br>ENSSSCT00000033745/<br>ENSSSCT00000035069/<br>ENSSSCT00000036352/<br>ENSSSCT00000036434/<br>ENSSSCT00000036440/<br>TCONS_00000968/TCO<br>NS_00001244/TCONS_<br>00001840/TCONS_0000<br>4794/TCONS_00004931<br>/TCONS_00007403/TC<br>ONS_00009137/TCONS<br>_00010673/TCONS_000<br>10927/TCONS_0001339<br>6/TCONS_00014448/TC | ENSSSCT00000002510/ENS<br>SSCT00000002713/ENSSSC<br>T00000005271/ENSSSCT000<br>00008947/ENSSSCT0000001<br>3323/ENSSSCT00000015660/<br>ENSSSCT00000015663/ENS<br>SSCT00000017282/ENSSSC<br>T00000018768/ENSSSCT000<br>00019062/ENSSSCT0000001<br>9601/ENSSSCT00000027298/<br>ENSSSCT00000027462/ENS<br>SSCT00000028216/ENSSSC<br>T00000028542/ENSSSCT000<br>00028884/ENSSSCT0000002<br>9040/ENSSSCT00000030802/<br>ENSSSCT00000031509/ENS<br>SSCT00000035485/ENSSSC<br>T00000035973/ENSSSCT000<br>00036290/TCONS_00003027/<br>TCONS_00003539/TCONS_0<br>0004594/TCONS_00004796/<br>TCONS_00006377/TCONS_0<br>0007428/TCONS_00008348/<br>TCONS_00008709/TCONS_0<br>0011115/TCONS_00011158/<br>TCONS_00012424/TCONS_0<br>0013318/TCONS_00014951/<br>TCONS_00015685/TCONS_0<br>0016536/TCONS_00017991/<br>TCONS_00020520/TCONS_0<br>0022007/TCONS_00022468/ |
| Cellul<br>ar<br>Comp<br>onent | organel<br>le                               | 79 | 81 |                                                                                                                                                                                                                                                                                                                                                                                                                                                                                                                                                                                                                                                                                                                                   |                                                                                                                                                                                                                                                                                                                                                                                                                                                                                                                                                                                                                                                                                                                                                                                                                                                         |

ONS\_00016637/TCONS TCONS\_00024980/TCONS\_0  
 \_00018210/TCONS\_000 0024981/TCONS\_00025388/  
 18343/TCONS\_0002045 TCONS\_00028230/TCONS\_0  
 9/TCONS\_00025216/TC 0031135/TCONS\_00031328/  
 ONS\_00028187/TCONS TCONS\_00032179/TCONS\_0  
 \_00028503/TCONS\_000 0035601/TCONS\_00038058/  
 28863/TCONS\_0002907 TCONS\_00041695/TCONS\_0  
 5/TCONS\_00033167/TC 0042856/TCONS\_00045630/  
 ONS\_00033609/TCONS TCONS\_00048384/TCONS\_0  
 \_00034199/TCONS\_000 0049436/TCONS\_00049673/  
 36842/TCONS\_0003717 TCONS\_00050770/TCONS\_0  
 1/TCONS\_00042642/TC 0052642/TCONS\_00052677/  
 ONS\_00046597/TCONS TCONS\_00052953/TCONS\_0  
 \_00049007/TCONS\_000 0058416/TCONS\_00060620/  
 49538/TCONS\_0004967 TCONS\_00068370/TCONS\_0  
 2/TCONS\_00050395/TC 0072603/TCONS\_00073850/  
 ONS\_00051311/TCONS TCONS\_00076154/TCONS\_0  
 \_00051555/TCONS\_000 0076744/TCONS\_00077645/  
 55773/TCONS\_0005749 TCONS\_00081205/TCONS\_0  
 9/TCONS\_00059278/TC 0084390/TCONS\_00084552/  
 ONS\_00059949/TCONS TCONS\_00085505/TCONS\_0  
 \_00063147/TCONS\_000 0085544/TCONS\_00086748/  
 64907/TCONS\_0006773 TCONS\_00090841/TCONS\_0  
 3/TCONS\_00072374/TC 0092241/TCONS\_00096230/  
 ONS\_00074295/TCONS TCONS\_00100501/TCONS\_0  
 \_00076786/TCONS\_000 0100510/TCONS\_00100513/  
 80151/TCONS\_0008123 TCONS\_00100515  
 9/TCONS\_00084266/TC  
 ONS\_00087175/TCONS  
 \_00087195/TCONS\_000  
 88728/TCONS\_0009020  
 0/TCONS\_00091479/TC  
 ONS\_00094383/TCONS  
 \_00095452/TCONS\_000  
 96376/TCONS\_0009715  
 9/TCONS\_00097868/TC  
 ONS\_00099248  
 ENSSSCT00000001329/ ENSSSCT00000002510/ENS  
 ENSSSCT00000002252/ SSCT00000002713/ENSSSC  
 ENSSSCT00000002808/ T00000005271/ENSSSCT000  
 ENSSSCT00000007534/ 00008247/ENSSSCT0000000  
 ENSSSCT00000008741/ 8947/ENSSSCT00000011053/  
 ENSSSCT00000009461/ ENSSSCT00000013322/ENS  
 ENSSSCT00000011308/ SSCT00000013323/ENSSSC

Cellul  
 ar cell  
 Comp part  
 onent

91

106

ENSSSCT00000011527/ T00000015576/ENSSSCT000  
ENSSSCT00000013502/ 00015660/ENSSSCT0000001  
ENSSSCT00000013571/ 5663/ENSSSCT00000017016/  
ENSSSCT00000014241/ ENSSSCT00000017282/ENS  
ENSSSCT00000015449/ SSCT00000018768/ENSSSC  
ENSSSCT00000016961/ T00000019062/ENSSSCT000  
ENSSSCT00000017392/ 00019601/ENSSSCT0000002  
ENSSSCT00000018381/ 6377/ENSSSCT00000027298/  
ENSSSCT00000019098/ ENSSSCT00000027462/ENS  
ENSSSCT00000019681/ SSCT00000027869/ENSSSC  
ENSSSCT00000019687/ T00000028216/ENSSSCT000  
ENSSSCT00000026451/ 00028542/ENSSSCT0000002  
ENSSSCT00000027771/ 8884/ENSSSCT00000029040/  
ENSSSCT00000028237/ ENSSSCT00000030802/ENS  
ENSSSCT00000029625/ SSCT00000031509/ENSSSC  
ENSSSCT00000029905/ T00000032277/ENSSSCT000  
ENSSSCT00000031037/ 00035485/ENSSSCT0000003  
ENSSSCT00000031122/ 5973/ENSSSCT00000036290/  
ENSSSCT00000031428/ ENSSSCT00000036373/TCO  
ENSSSCT00000033745/ NS\_00003027/TCONS\_00003  
ENSSSCT00000035069/ 539/TCONS\_00004594/TCO  
ENSSSCT00000036352/ NS\_00004796/TCONS\_00004  
ENSSSCT00000036434/ 822/TCONS\_00006377/TCO  
ENSSSCT00000036440/ NS\_00007428/TCONS\_00008  
ENSSSCT00000036536/ 709/TCONS\_00011115/TCO  
TCONS\_00000968/TCO NS\_00011158/TCONS\_00012  
NS\_00001244/TCONS\_ 424/TCONS\_00013318/TCO  
00001840/TCONS\_0000 NS\_00014951/TCONS\_00015  
4794/TCONS\_00004931 685/TCONS\_00016536/TCO  
/TCONS\_00007403/TC NS\_00017991/TCONS\_00020  
ONS\_00009137/TCONS 520/TCONS\_00022007/TCO  
\_00010673/TCONS\_000 NS\_00022468/TCONS\_00024  
10927/TCONS\_0001287 980/TCONS\_00024981/TCO  
0/TCONS\_00012908/TC NS\_00025388/TCONS\_00028  
ONS\_00013396/TCONS 230/TCONS\_00028709/TCO  
\_00014448/TCONS\_000 NS\_00029348/TCONS\_00031  
16637/TCONS\_0001821 135/TCONS\_00031328/TCO  
0/TCONS\_00018343/TC NS\_00032179/TCONS\_00035  
ONS\_00020459/TCONS 093/TCONS\_00035410/TCO  
\_00025216/TCONS\_000 NS\_00035601/TCONS\_00038  
28187/TCONS\_0002850 058/TCONS\_00041695/TCO  
3/TCONS\_00028863/TC NS\_00042603/TCONS\_00042  
ONS\_00029075/TCONS 856/TCONS\_00045347/TCO  
\_00033167/TCONS\_000 NS\_00045349/TCONS\_00045

33609/TCONS\_0003393 630/TCONS\_00045691/TC  
 7/TCONS\_00036842/TC NS\_00045692/TCONS\_00048  
 ONS\_00042642/TCONS 384/TCONS\_00049436/TCO  
 \_00046541/TCONS\_000 NS\_00049673/TCONS\_00050  
 46597/TCONS\_0004900 770/TCONS\_00052642/TCO  
 7/TCONS\_00049538/TC NS\_00052677/TCONS\_00052  
 ONS\_00049672/TCONS 953/TCONS\_00054717/TCO  
 \_00050395/TCONS\_000 NS\_00058416/TCONS\_00060  
 51311/TCONS\_0005155 021/TCONS\_00060620/TCO  
 5/TCONS\_00055773/TC NS\_00065835/TCONS\_00072  
 ONS\_00057499/TCONS 603/TCONS\_00073850/TCO  
 \_00059278/TCONS\_000 NS\_00076154/TCONS\_00076  
 59949/TCONS\_0006314 744/TCONS\_00077645/TCO  
 7/TCONS\_00064907/TC NS\_00078029/TCONS\_00081  
 ONS\_00067733/TCONS 205/TCONS\_00084390/TCO  
 \_00072374/TCONS\_000 NS\_00084498/TCONS\_00084  
 74295/TCONS\_0007678 552/TCONS\_00085505/TCO  
 6/TCONS\_00080151/TC NS\_00085534/TCONS\_00085  
 ONS\_00080339/TCONS 544/TCONS\_00086748/TCO  
 \_00081239/TCONS\_000 NS\_00090841/TCONS\_00092  
 83694/TCONS\_0008426 241/TCONS\_00096230/TCO  
 6/TCONS\_00087175/TC NS\_00100501/TCONS\_00100  
 ONS\_00087195/TCONS 510/TCONS\_00100513/TCO  
 \_00090200/TCONS\_000 NS\_00100515/TCONS\_00100  
 91479/TCONS\_0009438 528/TCONS\_00100529  
 3/TCONS\_00095452/TC  
 ONS\_00096376/TCONS  
 \_00097868/TCONS\_000

99248

ENSSSCT00000001329/ ENSSSCT00000002510/ENS  
 ENSSSCT00000002252/ SSCT00000002713/ENSSSC  
 ENSSSCT00000002808/ T00000005271/ENSSSCT000  
 ENSSSCT00000007534/ 00008247/ENSSSCT0000000  
 ENSSSCT00000008741/ 8947/ENSSSCT00000011053/  
 ENSSSCT00000009461/ ENSSSCT00000013322/ENS  
 ENSSSCT00000011308/ SSCT00000013323/ENSSSC  
 ENSSSCT00000011527/ T00000015576/ENSSSCT000  
 ENSSSCT00000013502/ 00015660/ENSSSCT0000001  
 ENSSSCT00000013571/ 5663/ENSSSCT00000017016/  
 ENSSSCT00000014241/ ENSSSCT00000017282/ENS  
 ENSSSCT00000015449/ SSCT00000018768/ENSSSC  
 ENSSSCT00000016961/ T00000019062/ENSSSCT000  
 ENSSSCT00000017392/ 00019601/ENSSSCT0000002  
 ENSSSCT00000018381/ 6377/ENSSSCT00000027298/

Cellular  
Component

cell

91

106

|                     |                          |
|---------------------|--------------------------|
| ENSSSCT00000019098/ | ENSSSCT00000027462/ENS   |
| ENSSSCT00000019681/ | SSCT00000027869/ENSSSC   |
| ENSSSCT00000019687/ | T00000028216/ENSSSCT000  |
| ENSSSCT00000026451/ | 00028542/ENSSSCT0000002  |
| ENSSSCT00000027771/ | 8884/ENSSSCT00000029040/ |
| ENSSSCT00000028237/ | ENSSSCT00000030802/ENS   |
| ENSSSCT00000029625/ | SSCT00000031509/ENSSSC   |
| ENSSSCT00000029905/ | T00000032277/ENSSSCT000  |
| ENSSSCT00000031037/ | 00035485/ENSSSCT0000003  |
| ENSSSCT00000031122/ | 5973/ENSSSCT00000036290/ |
| ENSSSCT00000031428/ | ENSSSCT00000036373/TCO   |
| ENSSSCT00000033745/ | NS_00003027/TCONS_00003  |
| ENSSSCT00000035069/ | 539/TCONS_00004594/TCO   |
| ENSSSCT00000036352/ | NS_00004796/TCONS_00004  |
| ENSSSCT00000036434/ | 822/TCONS_00006377/TCO   |
| ENSSSCT00000036440/ | NS_00007428/TCONS_00008  |
| ENSSSCT00000036536/ | 709/TCONS_00011115/TCO   |
| TCONS_00000968/TCO  | NS_00011158/TCONS_00012  |
| NS_00001244/TCONS_  | 424/TCONS_00013318/TCO   |
| 00001840/TCONS_0000 | NS_00014951/TCONS_00015  |
| 4794/TCONS_00004931 | 685/TCONS_00016536/TCO   |
| /TCONS_00007403/TC  | NS_00017991/TCONS_00020  |
| ONS_00009137/TCONS  | 520/TCONS_00022007/TCO   |
| _00010673/TCONS_000 | NS_00022468/TCONS_00024  |
| 10927/TCONS_0001287 | 980/TCONS_00024981/TCO   |
| 0/TCONS_00012908/TC | NS_00025388/TCONS_00028  |
| ONS_00013396/TCONS  | 230/TCONS_00028709/TCO   |
| _00014448/TCONS_000 | NS_00029348/TCONS_00031  |
| 16637/TCONS_0001821 | 135/TCONS_00031328/TCO   |
| 0/TCONS_00018343/TC | NS_00032179/TCONS_00035  |
| ONS_00020459/TCONS  | 093/TCONS_00035410/TCO   |
| _00025216/TCONS_000 | NS_00035601/TCONS_00038  |
| 28187/TCONS_0002850 | 058/TCONS_00041695/TCO   |
| 3/TCONS_00028863/TC | NS_00042603/TCONS_00042  |
| ONS_00029075/TCONS  | 856/TCONS_00045347/TCO   |
| _00033167/TCONS_000 | NS_00045349/TCONS_00045  |
| 33609/TCONS_0003393 | 630/TCONS_00045691/TCO   |
| 7/TCONS_00036842/TC | NS_00045692/TCONS_00048  |
| ONS_00042642/TCONS  | 384/TCONS_00049436/TCO   |
| _00046541/TCONS_000 | NS_00049673/TCONS_00050  |
| 46597/TCONS_0004900 | 770/TCONS_00052642/TCO   |
| 7/TCONS_00049538/TC | NS_00052677/TCONS_00052  |
| ONS_00049672/TCONS  | 953/TCONS_00054717/TCO   |
| _00050395/TCONS_000 | NS_00058416/TCONS_00060  |

|  |  |  |  |                     |                         |
|--|--|--|--|---------------------|-------------------------|
|  |  |  |  | 51311/TCONS_0005155 | 021/TCONS_00060620/TC   |
|  |  |  |  | 5/TCONS_00055773/TC | NS_00065835/TCONS_00072 |
|  |  |  |  | ONS_00057499/TCONS  | 603/TCONS_00073850/TCO  |
|  |  |  |  | _00059278/TCONS_000 | NS_00076154/TCONS_00076 |
|  |  |  |  | 59949/TCONS_0006314 | 744/TCONS_00077645/TCO  |
|  |  |  |  | 7/TCONS_00064907/TC | NS_00078029/TCONS_00081 |
|  |  |  |  | ONS_00067733/TCONS  | 205/TCONS_00084390/TCO  |
|  |  |  |  | _00072374/TCONS_000 | NS_00084498/TCONS_00084 |
|  |  |  |  | 74295/TCONS_0007678 | 552/TCONS_00085505/TCO  |
|  |  |  |  | 6/TCONS_00080151/TC | NS_00085534/TCONS_00085 |
|  |  |  |  | ONS_00080339/TCONS  | 544/TCONS_00086748/TCO  |
|  |  |  |  | _00081239/TCONS_000 | NS_00090841/TCONS_00092 |
|  |  |  |  | 83694/TCONS_0008426 | 241/TCONS_00096230/TCO  |
|  |  |  |  | 6/TCONS_00087175/TC | NS_00100501/TCONS_00100 |
|  |  |  |  | ONS_00087195/TCONS  | 510/TCONS_00100513/TCO  |
|  |  |  |  | _00090200/TCONS_000 | NS_00100515/TCONS_00100 |
|  |  |  |  | 91479/TCONS_0009438 | 528/TCONS_00100529      |
|  |  |  |  | 3/TCONS_00095452/TC |                         |
|  |  |  |  | ONS_00096376/TCONS  |                         |
|  |  |  |  | _00097868/TCONS_000 |                         |
|  |  |  |  | 99248               |                         |
|  |  |  |  | TCONS_00001840/TCO  |                         |
|  |  |  |  | NS_00004931/TCONS_  | ENSSSCT00000005271/ENS  |
|  |  |  |  | 00007403/TCONS_0001 | SSCT00000013323/ENSSSC  |
|  |  |  |  | 4448/TCONS_00016637 | T00000036290/TCONS_0000 |
|  |  |  |  | /TCONS_00018210/TC  | 3027/TCONS_00004594/TCO |
|  |  |  |  | ONS_00018343/TCONS  | NS_00006377/TCONS_00007 |
|  |  |  |  | _00020459/TCONS_000 | 428/TCONS_00008709/TCO  |
|  |  |  |  | 25216/TCONS_0002886 | NS_00012424/TCONS_00015 |
|  |  |  |  | 3/TCONS_00033609/TC | 685/TCONS_00016536/TCO  |
|  |  |  |  | ONS_00042642/TCONS  | NS_00022468/TCONS_00031 |
|  |  |  |  | _00049672/TCONS_000 | 328/TCONS_00035601/TCO  |
|  |  |  |  | 50395/TCONS_0005131 | NS_00038058/TCONS_00041 |
|  |  |  |  | 1/TCONS_00051555/TC | 695/TCONS_00045630/TCO  |
|  |  |  |  | ONS_00055773/TCONS  | NS_00049673/TCONS_00052 |
|  |  |  |  | _00057499/TCONS_000 | 642/TCONS_00052953/TCO  |
|  |  |  |  | 59278/TCONS_0005994 | NS_00058416/TCONS_00068 |
|  |  |  |  | 9/TCONS_00063147/TC | 370/TCONS_00073850/TCO  |
|  |  |  |  | ONS_00064907/TCONS  | NS_00076154/TCONS_00077 |
|  |  |  |  | _00072374/TCONS_000 | 645/TCONS_00081205/TCO  |
|  |  |  |  | 87175/TCONS_0008719 | NS_00084552/TCONS_00086 |
|  |  |  |  | 5/TCONS_00090200/TC | 748/TCONS_00092241/TCO  |
|  |  |  |  | ONS_00094383/TCONS  | NS_00096230/TCONS_00100 |
|  |  |  |  | _00096376           | 501                     |

Cellul  
ar organel  
Comp le part  
onent

28

31



|                    |                                |    |    |                                                                                                                                                                                                    |                                                                                                                                                                                                                                                                                                                                                                         |
|--------------------|--------------------------------|----|----|----------------------------------------------------------------------------------------------------------------------------------------------------------------------------------------------------|-------------------------------------------------------------------------------------------------------------------------------------------------------------------------------------------------------------------------------------------------------------------------------------------------------------------------------------------------------------------------|
| Cellular Component | nucleoid                       | 2  | 0  | TCONS_00020459/TCONS_00046597                                                                                                                                                                      |                                                                                                                                                                                                                                                                                                                                                                         |
| Cellular Component | membrane-enclosed lumen        | 12 | 13 | TCONS_00001840/TCONS_00004931/TCONS_00007403/TCONS_00014448/TCONS_00018343/TCONS_00033609/TCONS_00049672/TCONS_00055773/TCONS_00063147/TCONS_00072374/TCONS_00087175/TCONS_00096376                | ENSSSCT00000005271/ENSSSCT00000013323/ENSSSCT00000036290/TCONS_0003027/TCONS_00015685/TCONS_00016536/TCONS_00038058/TCONS_00049673/TCONS_00052642/TCONS_00052953/TCONS_00073850/TCONS_00092241/TCONS_00100501                                                                                                                                                           |
| Cellular Component | collagen trimer                | 0  | 2  |                                                                                                                                                                                                    | TCONS_00016869/TCONS_00016870                                                                                                                                                                                                                                                                                                                                           |
| Cellular Component | membrane part                  | 13 | 24 | TCONS_00003237/TCONS_00028503/TCONS_00036842/TCONS_00037492/TCONS_00046541/TCONS_00049672/TCONS_00051555/TCONS_00057499/TCONS_00063147/TCONS_00074295/TCONS_00080151/TCONS_00087195/TCONS_00091479 | TCONS_00004822/TCONS_00008709/TCONS_00011158/TCONS_00014951/TCONS_00020222/TCONS_00022468/TCONS_00031548/TCONS_00035093/TCONS_00049436/TCONS_00049673/TCONS_00050770/TCONS_00053886/TCONS_00054717/TCONS_00058416/TCONS_00066789/TCONS_00068370/TCONS_00076154/TCONS_00077645/TCONS_00083743/TCONS_00084552/TCONS_00085534/TCONS_00085544/TCONS_00096230/TCONS_00098627 |
| Cellular Component | extracellular matrix           | 1  | 7  | TCONS_00094383                                                                                                                                                                                     | ENSSSCT00000007604/ENSSSCT00000031950/TCONS_00014951/TCONS_00016869/TCONS_00016870/TCONS_00028230/TCONS_00083246                                                                                                                                                                                                                                                        |
| Cellular Component | extracellular matrix component | 1  | 3  | TCONS_00094383                                                                                                                                                                                     | TCONS_00016869/TCONS_00016870/TCONS_00028230                                                                                                                                                                                                                                                                                                                            |

|                    |                        |    |    |                                                                                                                                                                                                |                                                                                                                                                                                                                                                                                                                                                                                                                                                                                                                                                                                                                                                                                                          |                                                                                                                                                                                                                                                                                                                                                                                                                                                                  |
|--------------------|------------------------|----|----|------------------------------------------------------------------------------------------------------------------------------------------------------------------------------------------------|----------------------------------------------------------------------------------------------------------------------------------------------------------------------------------------------------------------------------------------------------------------------------------------------------------------------------------------------------------------------------------------------------------------------------------------------------------------------------------------------------------------------------------------------------------------------------------------------------------------------------------------------------------------------------------------------------------|------------------------------------------------------------------------------------------------------------------------------------------------------------------------------------------------------------------------------------------------------------------------------------------------------------------------------------------------------------------------------------------------------------------------------------------------------------------|
| Cellular Component | cell junction          | 3  | 6  | TCONS_00057499/TCONS_00074295/TCONS_00097868                                                                                                                                                   | TCONS_00008709/TCONS_00045691/TCONS_00045692/TCONS_00085544/TCONS_00096230/TCONS_00098627/ENSSSCT00000002713/ENSSSCT00000008247/ENSSSCT00000001329/T00000011053/ENSSSCT0000000031428/00015576/ENSSSCT00000017016/ENSSSCT00000027869/ENSSSCT00000036373/TCONS_00000968/TCONS_00001840/TCONS_00003237/TCONS_0009137/TCONS_00014448/TCONS_00018210/TCONS_00020459/TCONS_00025216/TCONS_00028503/TCONS_00033609/TCONS_00033937/TCONS_00036842/TCONS_00037492/TCONS_00042642/TCONS_00046541/TCONS_00049007/TCONS_00049672/TCONS_00051555/TCONS_00055773/TCONS_00057499/TCONS_00059278/TCONS_00063147/TCONS_00072374/TCONS_00074295/TCONS_00080151/TCONS_00087195/TCONS_00090200/TCONS_00091479/TCONS_00097868 | TCONS_00008709/TCONS_0001158/TCONS_00012424/TCONS_00014951/TCONS_00020222/TCONS_00022468/TCONS_00025388/TCONS_00031328/TCONS_00031548/TCONS_00035093/TCONS_00045630/TCONS_00045691/TCONS_00049436/TCONS_00049673/TCONS_00050770/TCONS_00052953/TCONS_00053886/TCONS_00054717/TCONS_00058416/TCONS_00066789/TCONS_00068370/TCONS_00073850/TCONS_00076154/TCONS_00077645/TCONS_00083743/TCONS_00084552/TCONS_00085534/TCONS_00085544/TCONS_00096230/TCONS_00100501 |
| Cellular Component | membrane               | 31 | 42 | ENSSSCT00000001329/ENSSSCT00000002808/ENSSSCT00000008741/ENSSSCT00000013571/ENSSSCT00000017392/ENSSSCT00000019098/ENSSSCT00000026451/ENSSSCT00000035069/ENSSSCT00000036352/ENSSSCT00000036536/ | ENSSSCT00000005271/ENSSSCT00000008247/ENSSSCT00000008947/ENSSSCT000000019062/ENSSSCT00000019601/ENSSSCT00000027298/ENSSSCT00000027462/ENSSSCT00000028216/ENSSSCT000030802/ENSSSCT00000031509/ENSSSCT00000032277/                                                                                                                                                                                                                                                                                                                                                                                                                                                                                         |                                                                                                                                                                                                                                                                                                                                                                                                                                                                  |
| Cellular Component | macromolecular complex | 24 | 30 |                                                                                                                                                                                                |                                                                                                                                                                                                                                                                                                                                                                                                                                                                                                                                                                                                                                                                                                          |                                                                                                                                                                                                                                                                                                                                                                                                                                                                  |

|                               |                                     |   |    |                                           |                                                                                                                                                                                                                                                                                                                                                                                                 |                                                                                                                                                                                                                                                                                                                                       |
|-------------------------------|-------------------------------------|---|----|-------------------------------------------|-------------------------------------------------------------------------------------------------------------------------------------------------------------------------------------------------------------------------------------------------------------------------------------------------------------------------------------------------------------------------------------------------|---------------------------------------------------------------------------------------------------------------------------------------------------------------------------------------------------------------------------------------------------------------------------------------------------------------------------------------|
|                               |                                     |   |    |                                           | TCONS_00000968/TCO<br>NS_00004931/TCONS_<br>00012908/TCONS_0001<br>8210/TCONS_00018343<br>/TCONS_00028187/TC<br>ONS_00055773/TCONS<br>_00063147/TCONS_000<br>72374/TCONS_0008015<br>1/TCONS_00083694/TC<br>ONS_00087175/TCONS<br>_00091479/TCONS_000<br>96376                                                                                                                                   | ENSSSCT00000035973/ENS<br>SSCT00000036290/TCONS_<br>00006377/TCONS_00007428/<br>TCONS_00016536/TCONS_0<br>0016869/TCONS_00016870/<br>TCONS_00022007/TCONS_0<br>0049436/TCONS_00052642/<br>TCONS_00065835/TCONS_0<br>0073850/TCONS_00081205/<br>TCONS_00084498/TCONS_0<br>0086748/TCONS_00092241/<br>TCONS_00096230/TCONS_0<br>0100501 |
| Cellul<br>ar<br>Comp<br>onent | synapse<br>part                     | 0 | 2  |                                           | TCONS_00042856/TCONS_0<br>0096230                                                                                                                                                                                                                                                                                                                                                               |                                                                                                                                                                                                                                                                                                                                       |
| Cellul<br>ar<br>Comp<br>onent | synapse                             | 0 | 2  |                                           | TCONS_00042856/TCONS_0<br>0096230                                                                                                                                                                                                                                                                                                                                                               |                                                                                                                                                                                                                                                                                                                                       |
| Cellul<br>ar<br>Comp<br>onent | extracel<br>lular<br>region<br>part | 1 | 9  | ENSSSCT00000014800                        | ENSSSCT00000005288/ENS<br>SSCT00000007604/ENSSSC<br>T00000009813/ENSSSCT000<br>00031950/ENSSSCT0000003<br>4640/TCONS_00031548/TCO<br>NS_00045630/TCONS_00054<br>717/TCONS_00085544<br>ENSSSCT00000004436/ENS<br>SSCT00000005288/ENSSSC<br>T00000007604/ENSSSCT000<br>00009813/ENSSSCT0000003<br>1950/ENSSSCT00000034640/<br>TCONS_00031548/TCONS_0<br>0045630/TCONS_00054717/<br>TCONS_00085544 |                                                                                                                                                                                                                                                                                                                                       |
| Cellul<br>ar<br>Comp<br>onent | extracel<br>lular<br>region         | 2 | 10 | ENSSSCT00000014800/<br>ENSSSCT00000031972 | ENSSSCT00000005288/ENS<br>SSCT00000007604/ENSSSC<br>T00000009813/ENSSSCT0000003<br>1950/ENSSSCT00000034640/<br>TCONS_00031548/TCONS_0<br>0045630/TCONS_00054717/<br>TCONS_00085544                                                                                                                                                                                                              |                                                                                                                                                                                                                                                                                                                                       |

---
